**Title:**

Genomic evidence for population-specific responses to coevolving parasites in a New Zealand freshwater snail

**Author affiliations:**

Laura Bankers<sup>1</sup>, Peter Fields<sup>2</sup>, Kyle E. McElroy<sup>1</sup>, Jeffrey L. Boore<sup>3</sup>, John M. Logsdon, Jr.<sup>1</sup>, Maurine Neiman<sup>1</sup>

<sup>1</sup>Department of Biology, University of Iowa, 143 Biology Building, Iowa City, IA 52242, USA

<sup>2</sup>Zoologisches Institut, Universität Basel, Vesalgasse 1, Basel, CH-4051, Switzerland

<sup>3</sup>Department of Integrative Biology, University of California, 3040 Valley Life Sciences Building, Berkeley, CA 94720, USA

**Corresponding author:**

Laura Bankers  
[laura-rice@uiowa.edu](mailto:laura-rice@uiowa.edu)

**Author Contributions:**

LB, MN designed research; LB performed research; LB, PF, KEM analysed data; LB, MN wrote the paper; JLB, JML, MN funded the study; LB, MN, PF, KEM, JLB, JML edited manuscript.

## Abstract

Reciprocal coevolving interactions between hosts and parasites are a primary source of strong selection that can promote rapid and often population- or genotype-specific evolutionary change. These host-parasite interactions are also a major source of disease. Despite their importance, very little is known about the genomic basis of coevolving host-parasite interactions, particularly in nature. Here, we use gene expression and molecular sequence evolution approaches to take critical steps towards characterizing the genomic basis of interactions between the freshwater snail *Potamopyrgus antipodarum* and its coevolving sterilizing trematode parasite, *Microphallus* sp., a textbook example of natural coevolution. We found that *Microphallus*-infected *P. antipodarum* exhibit systematic downregulation of genes relative to uninfected *P. antipodarum*. The specific genes involved in parasite response differ markedly across lakes, consistent with a scenario where population-level coevolution is leading to population-specific host-parasite interactions and evolutionary trajectories. We also identified a set of rapidly evolving loci that present promising candidates for targets of parasite-mediated selection across lakes as well as within each lake population. These results constitute the first genomic evidence for population-specific responses to coevolving infection in the *P. antipodarum*-*Microphallus* interaction and provide new insights into the genomic basis of coevolutionary interactions in nature.

**Keywords:** Host-parasite interactions, coevolution, infection, gene expression,  $F_{ST}$

## Introduction

Host-parasite interactions constitute a primary source of natural selection and provide a powerful means of evaluating the evolutionary response to strong selection (1-2). Reciprocal antagonistic

selection for greater host resistance and parasite infectivity can lead to antagonistic coevolution between host and parasite (3), which can in turn maintain high genetic diversity (4-6) and drive rapid evolutionary diversification (4, 7, 8).

Host-parasite interactions often have a genetic basis (*e.g.*, 7-9), are linked to rapid molecular evolution (*e.g.*, 7, 10), and are associated with gene expression changes (*e.g.*, 11-13). Because most studies providing important insights into the genetic and genomic basis of host-parasite coevolutionary interactions have been limited to the laboratory (*e.g.*, 11, 14-15; but also see 16-17), we know very little about the evolutionary genomics of host-parasite interactions in natural populations (17). As such, elucidating the processes of coevolution in nature is a requirement both to characterize a primary driver of selection and to formulate targeted strategies to fight natural parasite populations (*e.g.* those that infect human populations, 18).

Characterization of parasite-mediated changes in host gene expression provides a powerful means of deciphering the genomic basis of natural coevolutionary interactions because expression changes are often genotype or population-specific (*e.g.*, 11), can affect host response to parasites (*e.g.*, 19), and underlie variation in resistance and susceptibility to infection (*e.g.*, 20).

The New Zealand freshwater snail *Potamopyrgus antipodarum* and its sterilizing coevolving trematode parasite *Microphallus* sp. ("*Microphallus*") provide an especially compelling context for characterizing the genomic basis of coevolution in natural populations. First, selection imposed by both host and parasite is extremely strong: infected snails are completely sterilized (21), and *Microphallus* that cannot infect the first *P. antipodarum* by which they are ingested will die (22). Second, different *P. antipodarum* populations experience consistently high *vs.* consistently low *Microphallus* infection frequencies (23-25), indicating that

infection frequency is a major determinant of the strength of parasite-mediated selection and, thus, the rate and mode of coevolution within each population. Third, *Microphallus* is locally adapted to *P. antipodarum* at both within- and among-lake scales (26-27), demonstrating the fine spatial scale of coevolution in this system. Fourth, the existence of many naturally replicated and separately evolving *P. antipodarum*-*Microphallus* interactions means that each population can be treated as a separate evolutionary experiment into the consequences of antagonistic coevolution. Fifth, rapid coevolution of *P. antipodarum* and *Microphallus* has been documented in both a natural population (28) and in an experimental coevolution study (29). Finally, other snail-trematode systems, many of which also involve ingestion by and infection of vertebrate final hosts, are common sources of human and wildlife diseases (30-31), highlighting the translational relevance of this study.

Multiple studies suggest that coevolutionary interactions between *P. antipodarum* and *Microphallus* fit a “matching alleles” infection genetics model, whereby there are no universally infective parasites or resistant hosts (26-27, 32-33). Rather, *P. antipodarum* susceptibility depends on whether the genotype of the *Microphallus* individual matches the *P. antipodarum* individual at loci involved in resistance. Similar matching-allele mechanisms are thought to operate in other snail-trematode systems such as the laboratory model *Biomphalaria glabrata*-*Schistosoma mansoni* (reviewed in 34). Recent studies suggest that both allelic identity (14) and gene expression (15) are likely involved in mediating *B. glabrata* susceptibility to *S. mansoni* infection, emphasizing the potentially central role for gene expression in determining outcomes of host-parasite interactions in this and other snail-trematode systems (30-31).

Here, we take critical steps towards illuminating the genomic basis of coevolution in this textbook example of antagonistic coevolution (e.g., 35-36) by using RNA-Seq to perform gene

expression and  $F_{ST}$  analyses for three replicated samples of *Microphallus*-infected vs. uninfected *P. antipodarum* from each of three different lake populations. In light of existing ecological evidence for population structure and local adaptation in this system, we expected to 1) observe divergence between populations at both the gene expression and genetic level, and 2), that such divergence should be especially notable with respect to genes likely to be involved in the coevolutionary response to *Microphallus* infection.

## Materials and Methods

**Sample collection and dissection.** Adult *P. antipodarum* were collected from shallow water (depth < 1m) habitats of three New Zealand lakes (Alexandrina, Kaniere, Selfe) known to contain relatively high *Microphallus* infection frequencies (~10-20%, 25; Table S1). Following transfer to the University of Iowa, we housed snails in 15 L tanks at 16°C with a 16:8 hour light:dark cycle and supplied *ad libitum* dried *Spirulina* (e.g., 37) until dissection.

Because *P. antipodarum* is polymorphic for reproductive mode and ploidy level (38, 39), we confined our RNA-Seq analyses to diploid adult non-brooding (non-reproductively active) females. These criteria ensured that we limited extraneous biological processes that may confound differences in gene expression related to interactions between *P. antipodarum* and *Microphallus*. We dissected each snail to determine sex (male vs. female), *Microphallus* infection status (infected vs. uninfected), and reproductive status (brooding vs. non-brooding). We used the infection data to establish infection frequency for each lake sample (Table S1). Because *Microphallus* infection fills the body cavity of *P. antipodarum*, we confined analyses to head tissue. While the use of head tissue necessarily prevents the analysis of genes that are solely expressed in body tissue, this approach is the only way to ensure that comparable tissue types are

isolated from both infected and uninfected snails. We stored one half of the head tissue in RNAlater® until RNA extraction and used the other head half for flow cytometric determination of ploidy level (following 40; SI Methods). For each RNA-sequencing replicate, we pooled head tissue from seven snails to obtain a sufficient amount of tissue for RNA extraction and sequencing. We obtained three biological replicates of parasite-infected and uninfected *P. antipodarum* from each of the three lakes, for a total of 18 replicates and 126 snails.

**RNA sequencing and *de novo* reference transcriptome assembly and annotation.** We extracted RNA following the Invitrogen TRIzol protocol (41), used the Illumina Truseq LS protocol for cDNA library preparation, and performed 2x100 bp paired-end RNA sequencing on an Illumina HiSeq 2000 (Illumina, San Diego, CA, 2012) (SI Methods). Next, we used FASTX Toolkit (42) and FastQC (43) to trim adapters, assess sequencing quality, and filter out low-quality reads. We used Trinity v. 2.0.4 (44-45) to generate an initial *de novo* assembly, which we filtered using TransDecoder (45), CD-HIT-EST (46), and Blobology (47) to produce a *de novo* reference transcriptome containing 62862 assembled transcripts (SI Methods, Table S2).

Using blastx (48) and Blast2GO (49) (SI Methods), we obtained blastx annotations for 10171 transcripts and both blastx and GO annotations for 15797 transcripts. Nearly 75% of our transcriptome did not receive GO annotations, meaning that the functions of the majority of genes in our transcriptome cannot yet be determined. This result is unsurprising in light of a distinct deficit of mollusc genome sequence data available to aid in annotation (50); though molluscs are the most species-rich animal phylum after arthropods (51), only eight (< 1.3%) of the 613 sequenced animal genomes available on NCBI as of February 2016 are from molluscs.

**RNA-Seq gene expression analyses, functional enrichment, and  $F_{ST}$  outlier analyses.** We used Tophat2 (52) to map RNA-Seq reads to our *de novo* reference transcriptome, followed by Cufflinks, Cuffmerge, and CuffDiff to estimate transcript abundance and quantify expression differences (53). We then visualized results with cummeRbund (54). We used our *de novo* transcriptome as our reference for all gene expression analyses. We used Blast2GO to compare the functions of differentially expressed genes and quantify the number of transcripts annotated with each GO term. We performed functional enrichment analyses and Fisher's Exact Tests as implemented in Blast2GO to identify significantly overrepresented functional groups among differentially expressed genes (SI Methods, Table S2).

We used  $F_{ST}$  outlier analyses to identify those genes that were evolving especially rapidly in infected *vs.* uninfected snails; these genes are candidates for *Microphallus*-mediated selection. We filtered our reference transcriptome to include only transcripts with fragments per kilobase per million reads mapped (FPKM) > 0 in all 18 replicates (30685 transcripts) to ensure each replicate was represented for all loci in the  $F_{ST}$  comparisons. We used Tophat2 (52) to map RNA-Seq reads to the filtered transcriptome and Picard Tools to prepare mapped reads for variant discovery (<http://picard.sourceforge.net>). Next, we used Samtools mpileup (55) to call SNPs from processed bam files, followed by Popoolation2 (56) to calculate  $F_{ST}$  per site. We used IBM SPSS Statistics v. 23 to perform outlier analyses and identify outlier SNPs between infected and uninfected snails (SI Methods). Finally, we compared levels of genetic differentiation (mean transcriptome-wide  $F_{ST}$ ) between infected and uninfected snails within each lake and mean transcriptome-wide  $F_{ST}$  between lakes using Bonferroni-corrected Welch's t-tests as implemented within IBM SPSS Statistics v. 23.

We used three complementary analytical approaches to quantify gene expression and genetic differentiation (Fig. S1). First, for the “inclusive analysis,” we identified differentially expressed genes likely to be broadly important for *P. antipodarum* response to *Microphallus* infection. We quantified expression for each transcript for all pooled replicates under both conditions (infected and uninfected) to determine expression differences between all infected vs. all uninfected snails (Fig. S1a). We then compared the annotated functions of differentially expressed genes and performed functional enrichment analyses to determine the types of genes broadly important for infection response. Next, we calculated mean transcriptome-wide  $F_{ST}$  and performed  $F_{ST}$  outlier analyses to measure genetic differentiation between infected and uninfected snails and identified functional annotations and expression patterns of each transcript containing one or more  $F_{ST}$  outlier SNPs.

Second, for the “within-lake analysis”, we compared gene expression patterns between infected vs. uninfected snails from each lake to characterize local (lake level) gene expression responses to *Microphallus* infection. This analysis included pairwise comparisons between infected and uninfected snails from each lake population (Fig. S1b). We then compared the functions of differentially expressed genes between infected and uninfected snails from each lake. We also calculated mean transcriptome-wide  $F_{ST}$  and performed  $F_{ST}$  outlier analyses between infected and uninfected snails within each lake. Finally, we determined the functional annotation and expression pattern of each outlier-containing transcript.

Third, in the “across-lake analysis”, we compared replicates by lake and infection status. Here, our goal was to use patterns of gene expression within and across lakes to evaluate evidence for local adaptation and identify genes likely to be locally important for response to *Microphallus* infection. We conducted every possible pairwise comparison of gene expression



between all replicates from all three lakes (Fig. S1c), allowing us to differentiate between genes that were differentially expressed in infected *vs.* uninfected replicates across the three lakes (*i.e.*, evidence for population-specific infection responses) and genes expressed differently across lakes regardless of infection status (*i.e.*, expression difference due to lake of origin rather than infection status). Annotation and functional enrichment analyses allowed us to identify putative functions of genes that were significantly differentially expressed between infected and uninfected snails in more than one lake population *vs.* within a single lake (SI Methods). We visualized these comparisons with Euler diagrams generated with eulerAPE v3 (57). Finally, we evaluated whether transcripts containing  $F_{ST}$  outliers between infected and uninfected snails contained outliers in multiple lake populations *vs.* only a single lake population.

## Results

**Inclusive analysis: Greater downregulation of transcripts in infected snails.** We identified 1408 significantly differentially expressed transcripts (FDR: 5%, Benjamini-Hochberg) between *Microphallus*-infected and uninfected snails (Figs. 1a, S1a). A significantly higher proportion of these transcripts were downregulated (1057, ~75%) *vs.* upregulated (351, ~25%) in infected *vs.* uninfected snails (Fisher's Exact Test:  $p < 0.0001$ ; Table 1, Fig. 1a), indicating that infected *P. antipodarum* experience systematic reduction in gene expression.

We obtained gene ontology (GO) annotations for 447 of these 1408 transcripts, 216 of which were significantly upregulated (hereafter “upregulated”) and 231 significantly downregulated (hereafter “downregulated”) in infected snails. 16 upregulated genes were annotated as involved in immune system processes (Fig. S2), making these loci our strongest candidates for direct involvement in response to *Microphallus* infection. The 10 genes with

putative brain/behaviour functions that were upregulated in infected snails (Fig. S2) are interesting in light of the well-characterized influence of *Microphallus* infection on *P. antipodarum* behaviour (e.g., 58). Functional enrichment revealed that in infected snails, antigen processing and presentation were overrepresented among upregulated genes. Processes related to transcription and translation were overrepresented among downregulated genes, consistent with our observation that infected snails had significantly more downregulated genes (Table S3).

Our inclusive  $F_{ST}$  analysis, comparing genetic differentiation between infected and uninfected snails, revealed a mean transcriptome-wide  $F_{ST}$  (SD) of 6.34367e-5 (7.35667e-6) and identified 58 outlier SNPs (mean  $F_{ST}$  of outliers (SD) of 0.497 (0.28)) from 46 transcripts. Of these 46 transcripts, three were downregulated and two were upregulated in infected snails, meaning the majority of  $F_{ST}$  outlier-containing genes were not significantly differentially expressed (Table 1). We obtained functional annotations for 21 of these 46 transcripts. We annotated the three genes that contained  $F_{ST}$  outlier SNPs and were downregulated in infected snails with functions related to immune and stress responses (Tables S4, S5).

**Within-lake analysis: Lake-specific responses to *Microphallus* infection.** Similar to the inclusive analysis, we observed a significantly greater proportion of downregulated vs. upregulated transcripts in infected *P. antipodarum* in two of the three lakes (Table 1, Figs. 1b, S1b). A total of 1539 transcripts were significantly differentially expressed between infected and uninfected snails in at least one of the three pairwise tests (Fig. 1b).

Functional enrichment for the within-lake analysis revealed that various metabolic processes are overrepresented among upregulated genes in infected snails from Alexandrina (Table S3). We did not detect significant functional enrichment for genes upregulated in infected

snails from lakes Selfe or Kaniere. Upregulated genes in uninfected snails from Alexandrina and Selfe are enriched for GO terms related to transcription and translation. Upregulated genes in uninfected snails from Kaniere are enriched for pantothenate metabolism (Table S3).

The mean transcriptome-wide  $F_{ST}$  between infected and uninfected snails within each lake was significantly different from each of the other lakes (Fig. 2), indicating population-specific levels of genetic differentiation between infected and uninfected snails. We identified 45, 40, and 51  $F_{ST}$  outlier SNPs between infected and uninfected snails (mean  $F_{ST}$  of outliers (SD) of 0.51 (0.28), 0.43 (0.24), and 0.52 (0.25)) from Alexandrina, Kaniere, and Selfe, respectively. Similar to the inclusive analysis, the vast majority of outlier-containing transcripts (96%) were not significantly differentially expressed (Table 1).

**Across-lake analysis: Lake of origin strongly influences genetic differentiation and gene expression.** We observed 6228 significantly differentially expressed transcripts within and across lakes (Figs. 3, S1c). ~75% (4689) of these 6228 transcripts were significantly differentially expressed across the three lakes regardless of infection status, indicating that lake of origin has a markedly stronger influence on gene expression than infection status (Figs. 1b, 3, 4, S3). Similarly, when replicates are clustered based on expression profile, they group first by lake of origin, followed by infection status. This result indicates both that population of origin is a key determinant of gene expression in *P. antipodarum* (Figs. 3, S3) and that infection results in predictable changes in expression (Fig. 3) that are detectable on this background of population divergence. These findings are consistent with and extend to the gene expression level evidence for population-specific phenotypes (40, 59) and marked population genetic structure (39, 60-61)

in *P. antipodarum*. These results also demonstrate that infection has marked consistent and systematic consequences for gene expression in this species.

We used the total number of transcripts identified as significantly differentially expressed between infected and uninfected snails (1539) in at least one of the three within-lake analyses (Fig. 1b) to compare the number of significantly up or downregulated transcripts in multiple vs. single populations, allowing us to determine whether snails from different lakes have similar gene expression responses to *Microphallus* infection. This comparison revealed that nearly all of the differentially expressed transcripts from the within-lake analysis (1447 transcripts, 94%) are only significantly differentially expressed in a single lake. Only 6% (92) of the differentially expressed transcripts showed significant differential expression in more than one population (Fig. 4). In summary, the vast majority of differentially expressed transcripts between infected and uninfected snails show significant up or downregulation in only one population, suggesting a distinct local (lake specific) gene expression response to parasite infection.

Next, we identified the types of genes that were significantly differentially expressed in single vs. multiple populations to parse out general vs. lake-specific infection responses. Of the 92 genes that were significantly differentially expressed in more than one lake, 22 genes were upregulated in infected snails (Table S6). We obtained GO annotations for seven of these genes, which had functions related to immune response, nervous system function, and metabolism. 10 of the 70 genes found to be significantly downregulated in infected snails in more than one lake received GO annotations, which included immune function, response to stimulus, and transcription/translation (Table S6). 396 of the 1447 genes that were significantly differentially expressed in only one lake received GO annotations (Fig. S2). Even though the particular genes experiencing differential expression differ on a lake-by-lake basis, these different genes often

belong to similar GO categories (*e.g.*, immune system processes, response to stimulus, and behaviour).

We also evaluated how many transcripts contained  $F_{ST}$  outlier SNPs in single *vs.* multiple populations. Similar to our gene expression analyses, we found that very few transcripts (6 transcripts, ~4%) containing  $F_{ST}$  outlier SNPs between infected and uninfected snails in one population also contained outlier SNPs in another population (3 transcripts each between Alexandrina and Kaniere and between Kaniere and Selfe). This result indicates that the focal loci of *Microphallus*-mediated selection are likely to often be population specific. Of the transcripts that contained outlier SNPs, 14, 12, and 15 transcripts were annotated for Alexandrina, Kaniere, and Selfe, respectively. 10 of these transcripts were annotated as relevant to immune response/function and 4 for neurological processes (Tables S4, S5).

Finally, we compared mean transcriptome-wide  $F_{ST}$  across lakes as a whole, for infected replicates only, and for uninfected replicates only. The mean  $F_{ST}$  was significantly different ( $p < 0.0001$ , Fig. 2) in all possible pairwise comparisons. We also found that  $F_{ST}$  between infected and uninfected snails within each lake was significantly lower than the mean  $F_{ST}$  for any across-lake comparison (Fig. 2), indicating greater levels of genetic differentiation among lake populations than between infected and uninfected snails within a population. This result is consistent with and extends to the genome level the outcome of marker-based studies (*e.g.*, 61) that have documented strong across-lake genetic structure in *P. antipodarum*.

## Discussion

We used gene expression and  $F_{ST}$  analyses to shed light on the genomic underpinnings of coevolution in a natural context. Most importantly, we found that infection of *P. antipodarum* by

its coevolving trematode parasite *Microphallus* elicits a marked, systematic, and population-specific gene expression response, with important potential implications for our understanding of the dynamics of coevolution. Our  $F_{ST}$  analyses allowed us to evaluate levels of genetic differentiation within and among lakes and revealed promising candidate genes for the focus of *Microphallus*-mediated selection. These findings provide a qualitative advance by extending evidence for local adaptation and coevolution in this textbook coevolutionary interaction to the genomic level, demonstrating distinct local genetic and gene expression responses by *P. antipodarum* to *Microphallus* infection. Together, these results illuminate the unique and important insights that can come from sampling multiple natural populations of interacting hosts and parasites.

**Systematic downregulation and response to parasite infection.** Our inclusive analysis revealed that the majority of transcripts that are significantly differentially expressed in infected snails are downregulated relative to uninfected snails. This pattern could reflect several non-mutually exclusive phenomena, ranging from tissue/organ destruction and/or overall poor condition of infected snails (*e.g.*, 11) to reallocation of resources to genes needed for defence against and response to *Microphallus* infection (*e.g.*, 62) to suppression of *P. antipodarum* gene expression by *Microphallus* as a means of evading host immune and defence systems (*e.g.*, 11, 13). Regardless of the specific mechanism(s) involved, the transcripts that are differentially expressed between infected and uninfected snails in the inclusive analysis represent a set of genes that are most likely to be of general importance to the *P. antipodarum*-*Microphallus* interaction. Our inclusive  $F_{ST}$  analyses yielded additional candidate genes for the focus of parasite-mediated selection, with the 58 SNPs from 46 genes that are evolving especially rapidly

providing a particularly strong set of candidate loci for *Microphallus* response. The presence of multiple genes annotated with immune/stress responses and with neurological and behaviour-related functions strengthens this conclusion.

**Genomic evidence for population-level responses to infection.** Our results demonstrate that *P. antipodarum* response to *Microphallus* infection is largely population specific. For example, in Alexandrina and Kaniere, the majority of significantly differentially expressed transcripts are downregulated in infected relative to uninfected snails (73% for Alexandrina and 66% for Kaniere). By contrast, the proportion of significantly upregulated and downregulated transcripts is much more similar in snails from Selfe (52% vs. 58%, respectively). This pattern is interesting in light of data from Vergara *et al.* (2013) suggesting that lake Selfe *P. antipodarum* have historically experienced lower frequencies of *Microphallus* infection (3.5x lower than Alexandrina, 1.4x lower than Kaniere; Table S1)(25), suggesting that lake Selfe snails are likely to have experienced a somewhat weaker intensity of *Microphallus*-mediated selection.

The vast majority (~87%) of differentially expressed transcripts were only significantly differentially expressed in a single lake population, and ~75% of significantly differentially expressed transcripts were expressed differently across lakes regardless of infection status. We also found significantly lower levels of genetic differentiation between snails within vs. across lakes, regardless of infection status. This result is consistent with previous evidence for population structure (*e.g.* 39, 60-61) and/or negative frequency-dependent selection driving divergence between populations (*e.g.*, 63). Together, these results demonstrate that lake of origin has a major influence on gene expression and genetic differentiation and provide the first genomic evidence consistent with local adaptation between *Microphallus* and *P. antipodarum*.

**Candidate loci for future research.** Our results provide a strong set of candidate loci for the genomic basis of *P. antipodarum* and *Microphallus* interactions. Three of the 16 upregulated immune-relevant genes are homologous to genes involved in response to trematode infection in the *Biomphalaria glabrata-Schistosoma mansoni* host-parasite system (e.g., 64; reviewed in 65), suggesting these genes might play an important role in *P. antipodarum* response to *Microphallus* infection. We also identified seven downregulated genes with immune-related functions, including myosin light-chain kinase and fibrinogen-related proteins, which have also been shown to contribute to resistance to infection in the *Biomphalaria-Schistosoma* system (10, 64). Other significantly upregulated genes with immune-related functions in infected snails represent further candidates for response to *Microphallus* infection, while significantly downregulated genes with immune-related functions have the potential to be involved in resisting infection.

Among the genes upregulated in infected snails, we observed functional enrichment for actin, myosin, and genes with other cytoskeletal functions. Genes involved in cytoskeletal function, including actin and myosin, are upregulated upon parasite exposure in the *Biomphalaria-Schistosoma* system (reviewed in 65), indicating that these genes may also contribute to response to parasite infection in *P. antipodarum*. Oxidative processes have also been implicated in schistosome defence response in *Biomphalaria* (66, reviewed in 65); a preliminary line of evidence that oxidative processes may also be involved in the *P. antipodarum* trematode response is provided by significant functional enrichment of genes involved in oxidative processes (e.g., NADH oxidation, fatty acid beta-oxidation, energy derivation by oxidation of organic compounds) in infected snails.



The inclusive analysis revealed 21 upregulated and 16 downregulated genes with potential roles in important behavioural traits (*e.g.*, foraging, locomotion, mating) (Fig. S2). These results are consistent with evidence that exposure to (67) and infection by *Microphallus* (58, 68) affects *P. antipodarum* behaviour. In particular, infected snails forage at a higher frequency than uninfected snails during the time of day when the waterfowl that are *Microphallus*'s final host are active, rendering infected snails more vulnerable to predation (68). The implications are that these genes are a set of candidates for potential genetic mechanisms and pathways involved in *Microphallus*-induced alterations to *P. antipodarum* behaviour that could influence transmission probability. Future study of snails from natural populations featuring little to no *Microphallus* infection (23, 38) as well as manipulative experiments that allow comparisons between exposed *vs.* unexposed and infected *vs.* uninfected individuals will provide valuable additional steps forward by enabling differentiation between exposed but uninfected *vs.* naïve individuals.

Genes involved in the regulation of gene expression and ribosome structure and function were overrepresented among significantly downregulated genes. These results are consistent with our overall observation that infected snails had significantly more downregulated *vs.* upregulated genes, suggesting that *Microphallus* infection leads to decreased overall gene expression in *P. antipodarum*. These results are strikingly similar to a recent laboratory study showing that bumblebees (*Bombus terrestris*) exposed to particularly infective genotypes of a trypanosome parasite (*Crithidia bombi*) downregulated more genes than unexposed bumblebees (11). Similar results have been reported in other lab-based studies (*e.g.*, 14-15). Our results thus extend to natural coevolving populations the growing body of evidence that infected hosts experience systematic downregulation of gene expression.

**Summary and conclusions.** We present novel evidence for systematic but population-specific genetic and gene expression responses to parasite infection in the *P. antipodarum*-*Microphallus* coevolutionary interaction. These results are the first genome-level evidence for the type of population-specific response expected under local adaptation and coevolution in this important host-parasite system. We also identified genes with functions related to immune and defence response and behaviour that are likely involved in the *P. antipodarum* response to *Microphallus* infection, providing a set of candidate genes for involvement in the genomic basis of coevolution. The targeted exploration of these genes made possible by these results will help illuminate the genetic and genomic mechanisms that determine the outcome of interactions between coevolving hosts and parasites in nature.

**Data accessibility:** All RNA-Seq data will be made publically available on the NCBI GEO database upon article acceptance.

**Competing interests:** We have no competing interests.

## **Acknowledgements**

We thank Gery Hehman for RNA sequencing assistance, Curt Lively and Daniela Vergara for field collections, Joel Sharbrough for the custom python script used in our transcriptome pipeline, and Kayla King for helpful comments on an earlier version of this manuscript. The ploidy identification data presented herein were obtained at the Flow Cytometry Facility, which is a Carver College of Medicine/Holden Comprehensive Cancer Center core research facility at

389 the University of Iowa. The Facility is funded through user fees and the generous financial  
 390 support of the Carver College of Medicine, Holden Comprehensive Cancer Center, and Iowa  
 391 City Veteran's Administration Medical Center. This project was funded by NSF-MCB 1122176.

## References

1. Hamilton WD (1980). Sex *versus* non-sex *versus* parasite. *Oikos* 35:282–290. (doi:10.2307/3544435)
2. Abbate J, Kada S, Lion S (2015) Beyond mortality: sterility as a neglected component of parasite virulence. *PLoS Pathog* 11:1-10. (doi:10.1371/journal.ppat.1005229)
3. Ehrlich PR, Raven PH (1964) Butterflies and plants: a study of coevolution. *Evolution* 18:586-608. (doi:10.2307/2406212)
4. Laine AL (2009) Role of coevolution in generating biological diversity: spatially divergent selection trajectories. *J Exp Bot* 60:2957-2970. (doi:10.1093/jxb/erp168)
5. Bérénos C, Wegner KM, Schmid-Hempel P (2011) Antagonistic coevolution with parasites maintains host genetic diversity: an experimental test. *Proc R Soc Lond B* 278:218-224. (doi:10.1098/rspb.2010.1211)
6. King KC, Jokela J, Lively CM (2011) Parasites, sex, and clonal diversity in natural snail populations. *Evolution* 65:1474-1481. (doi:10.1111/j.1558-5646.2010.01215.x)
7. Paterson S *et al.* (2010) Antagonistic coevolution accelerates molecular evolution. *Nature* 464:275-279. (doi:10.1038/nature08798)
8. Masri L *et al.* (2015). Host-pathogen coevolution: the selective advantage of *Bacillus thuringiensis* virulence and its cry toxin genes. *PLoS Biol* 13:1-30. (doi:10.1371/journal.pbio.1002169)
9. Luijckx P, Fienberg H, Duneau D, Ebert D (2013) A matching-allele model explains host resistance to parasites. *Curr Biol* 23:1085-1088. (doi:10.1016/j.cub.2013.04.064)
10. Tennessen JA, Théron A, Marine M, Yeh JY, Rognon A, Blouin MS (2015) Hyperdiverse gene cluster in snail host conveys resistance to human schistosome parasites. *PLoS Genet* 11:1-21. (doi:10.1371/journal.pgen.1005067)
11. Barribeau SM, Sadd BM, du Plessis L, Schmid-Hempel P (2014) Gene expression differences underlying genotype-by-genotype specificity in a host-parasite system. *Proc Natl Acad Sci USA* 111:3496-3501. (doi:10.1073/pnas.1318628111)
12. McTaggart SJ, Cézard T, Garbutt JS, Wilson PJ, Little TL (2015) Transcriptome profiling during a natural host-parasite interaction. *BMC Genomics* 16:643. (doi:10.1186/s12864-015-1838-0)
13. de Bekker C, Ohm RA, Loreto RG, Sebastian A, Albert I, Merrow M, Brachmann A, Hughes DP (2015) Gene expression during zombie ant biting behavior reflects the complexity underlying fungal parasitic behavioral manipulation. *BMC Genomics* 16:620. (doi:10.1186/s12864-015-1812-x)
14. Roger E, Grunau C, Pierce RJ, Hirai H, Gourbal B, Galinier R, Emans R, Cesari IM, Cosseau C, Mitta G (2008) Controlled chaos of polymorphic mucins in a metazoan

- parasite (*Schistosoma mansoni*) interacting with its invertebrate host (*Biomphalaria glabrata*). *PLoS Negl Trop Dis* 2:1-20. (doi:10.1371/journal.pntd.0000330)
15. Arican-Goktas HD, Ittiprasert W, Bridger JM, Knight M (2014) Differential spatial repositioning of activated genes in *Biomphalaria glabrata* snails infected with *Schistosoma mansoni*. *PLoS Negl Trop Dis* 8:1-10. (doi:10.1371/journal.pntd.0003013)
  16. Decaestecker E, Gaba S, Raeymaekers JAM, Stoks R, Van Kerckhoven L, Ebert D, De Meester L (2007) Host-parasite 'Red Queen' dynamics archived in pond sediment. *Nature* 450:870-873. (doi:10.1038/nature06291)
  17. Routtu J, Ebert D (2015) Genetic architecture of resistance in *Daphnia* hosts against two species of host-specific parasite. *Heredity* 114:241-248. (doi:10.1038/hdy.2014.97)
  18. Neafsey DE *et al.* (2015) Genetic diversity and protective efficacy of the RTS,S/AS01 malaria vaccine. *N Engl J Med* 373:2025-2037. (doi:10.1056/NEJMoa1505819)
  19. Brunner FS, Schmid-Hempel P, Barribeau SM (2013) Immune gene expression in *Bombus terrestris*: signatures of infection despite strong variation among populations, colonies, and sister workers. *PLoS ONE* 8:e68181. (doi:10.1371/journal.pone.0068181)
  20. Stutz WE, Schmerer M, Coates JL, Bolnick DI (2015) Among-lake reciprocal transplants induce convergent expression of immune genes in threespine stickleback. *Mol Ecol* 24:4629-4646. (doi:10.1111/mec.13295)
  21. Winterbourn ML (1973) Larval trematode parasitising the New Zealand species of *Potamopyrgus* (Gastropoda: Hydrobiidae). *Mauri Ora* 2:17-30.
  22. King KC, Jokela J, Lively CM (2011) Trematode parasites infect or die in snail hosts. *Biol Lett* 7:265-268. (doi:10.1098/rsbl.2010.0857)
  23. Lively CM, Jokela J (2002) Temporal and spatial distributions of parasites and sex in a freshwater snail. *Evol Ecol Res* 4:219-226.
  24. King KC, Lively CM (2009) Geographic variation in sterilizing parasite species and the Red Queen. *Oikos* 118:1416-1420. (doi:10.1111/j.1600-0706.2009.17476.x)
  25. Vergara D, Lively CM, King KC, Jokela J (2013) The geographic mosaic of sex and infection in lake populations of a New Zealand snail at multiple spatial scales. *Am Nat* 182:484-493. (doi:10.1086/671996)
  26. Lively CM, Dybdahl MF, Jokela J, Osnas EE, Delph LF (2004) Host sex and local adaptation by parasites in a snail-trematode interaction. *Am Nat* 164:S6-S18.
  27. King KC, Delph LF, Jokela J, Lively CM (2009) The geographic mosaic of sex and the Red Queen. *Curr Biol* 19:1438-1441. (doi:10.1016/j.cub.2009.06.062)
  28. Jokela J, Dybdahl MF, Lively CM (2009) The maintenance of sex, clonal dynamics, and host-parasite coevolution in a mixed population of sexual and asexual snails. *Am Nat* 174:43-S53. (doi:10.1086/599080)
  29. Koskella B, Lively CM (2009) Evidence for negative frequency-dependent selection during experimental coevolution of a freshwater snail and a sterilizing trematode. *Evolution* 63:2213-2221. (doi:10.1111/j.1558-5646.2009.00711.x)
  30. Hotez PJ (2013) Pediatric tropical diseases and the world's children living in extreme poverty. *J Appl Res Child* 4:10.
  31. Jurberg AD, Brindley PJ (2015) Gene function in schistosomes: recent advances toward a cure. *Front Genet* 6:144. (doi:10.3389/fgene.2015.00144)
  32. Dybdahl MF, Krist AC (2004) Genotypic vs. condition effects on parasite-driven rare advantage. *J Evol Biol* 17:967-973. (doi:10.1111/j.1420-9101.2004.00759.x)

33. Osnas EE, Lively CM (2005) Immune response to sympatric and allopatric parasites in a snail-trematode interaction. *Front Zool* 2:1-7. (doi:10.1186/1742-9994-2-8)
34. Adema CM, Loker ES (2015) Digenean-gastropod host associations inform on aspects of specific immunity in snails. *Dev Comp Immunol* 48:275-283. (doi:10.1016/j.dci.2014.06.014)
35. Zimmer C, Emlen DJ (2013) Evolution: Making Sense of Life. Roberts and Company Publishers, Inc. Greenwood Village, CO.
36. Herron JC, Freeman S (2014) Evolutionary Analysis, 5th edition. Pearson Education, Inc. Glenview, IL.
37. Zachar N, Neiman M (2013) Profound effects of population density on fitness-related traits in an invasive freshwater snail. *PLoS ONE* 8:e80067. (doi:10.1371/journal.pone.0080067)
38. Lively CM (1987) Evidence from a New Zealand snail for the maintenance of sex by parasitism. *Nature* 328:519-521. (doi:10.1038/328519a0)
39. Neiman M, Paczesniak D, Soper DM, Baldwin AT, Hehman G (2011) Wide variation in ploidy level and genome size in a New Zealand freshwater snail with coexisting sexual and asexual lineages. *Evolution* 65:3202-3216. (doi:10.1111/j.1558-5646.2011.01360.x)
40. Krist AC, Kay AD, Larkin K, Neiman M (2014) Response to phosphorus limitation varies among lake populations of the freshwater snail *Potamopyrgus antipodarum*. *PLoS ONE* 9:e85845. (doi:10.1371/journal.pone.0085845)
41. Chomczynski P (1993) A reagent for the single-step simultaneous isolation of RNA, DNA, and proteins from cell and tissue samples. *Biotechniques* 15: 532-534, 536-537.
42. Gordon A, Hannon G (2010) Fastx-toolkit. FASTQ/A short-read pre-processing tools (unpublished) [http://hannonlabshledu/fastx\\_toolkit/](http://hannonlabshledu/fastx_toolkit/).
43. Andrews S (2010) FastQC: A quality control tool for high throughput sequence data. Available: <http://www.bioinformatics.babraham.ac.uk/projects/fastqc/>.
44. Gabherr MG *et al.* (2011) Full-length transcriptome assembly from RNA-Seq data without a reference genome. *Nat Biotechnol* 29:644-652. (doi:10.1038/nbt.1883)
45. Haas BJ *et al.* (2013) *De novo* transcript sequence reconstruction from RNA-seq using the Trinity platform for reference generation and analysis. *Nat Protoc* 8:1494-1512. (doi:10.1038/nprot.2013.084)
46. Huang Y, Niu B, Gao Y, Fu L, Li W (2010) CD-HIT Suite: a web server for clustering and comparing biological sequences. *Bioinformatics* 26:680-682. (doi:10.1093/bioinformatics/btq003)
47. Kumar S, Jones M, Koutsovoulos G, Clarke M, Blaxter M (2013) Blobology: exploring raw genome data for contaminants, symbionts and parasites using taxon-annotated GC-coverage plots. *Front Genet* 4:237. (doi:10.3389/fgene.2013.00237)
48. Camacho C, Coulouris G, Avagyan V, Ma N, Papadopoulos J, Bealer K, Madden TL (2009) BLAST+: architecture and applications. *BMC Bioinformatics* 10:421. (doi:10.1186/1471-2105-10-421)
49. Conesa A, Götz S, García-Gómez JM, Terol J, Talón M, Robles M (2005) Blast2GO: a universal tool for annotation, visualization and analysis in functional genomics research. *Bioinformatics* 21:3674-3673. (doi:10.1093/bioinformatics/bti610)
50. Kocot KM, Jeffery NW, Mulligan K, Halanych KM, Gregory TR (2015) Genome size estimates for Aplacophora, Polyplacophora and Scaphopoda: small solenogasters and sizeable scaphopods. *J Molluscan Stud.* (doi:10.1093/mollus/eyv054)

51. Smith SA, Wilson NG, Goetz FE, Feehery C, Andrade SCS, Rouse GW, Giribet G, Dunn CW (2011) Resolving the evolutionary relationships of molluscs with phylogenomic tools *Nature* 480:364-367. (doi:10.1038/nature10526)
52. Trapnell C, Hendrickson DG, Sauvageau M, Goff L, Rinn JL, Pachter L (2013) Differential analysis of gene regulation at transcript resolution with RNA-seq. *Nat Biotechnol* 31:46-53. (doi:10.1038/nbt.2450)
53. Trapnell C, Roberts A, Goff L, Pertea G, Kim D, Kelley DR, Pimentel H, Salzberg SL, Rinn JL, Pachter L (2012) Differential gene and transcript expression analysis of RNA-Seq experiments with TopHat and Cufflinks. *Nat Protoc* 7:562-578. (doi:10.1038/nprot.2012.016)
54. Goff L, Trapnell C, Kelley D (2013) cummeRbund: Analysis, exploration, manipulation, and visualization of Cufflinks high-throughput sequencing data. R Package v. 2.12.0.
55. Li J, Witten DM, Johnstone IM, Tibshirani R (2012) Normalization, testing, and false discovery rate estimation for RNA-sequencing data. *Biostatistics* 13:523-538. (doi:10.1093/biostatistics/kxr031)
56. Kofler R, Pandey RV, Schlötterer C (2011) Popoolation2: identifying differentiation between populations using sequencing of pooled DNA samples (Pool-Seq). *Bioinformatics* 27:3435-3436. (doi:10.1093/bioinformatics/btr589)
57. Micallef L, Rodgers P (2014) eulerAPE: Drawing area-proportional 3-Venn diagrams using ellipses. *PLoS ONE* 9:e101717. (doi:10.1371/journal.pone.0101717)
58. Levri P (1999) Parasite-induced change in host behavior of a freshwater snail: parasitic manipulation or byproduct of infection? *Behav Ecol* 10:234-241. (doi:10.1093/beheco/10.3.234)
59. Holomuzki JR, Biggs BJF (2006) Habitat-specific variation and performance trade-offs in shell armature of New Zealand mudsnails. *Ecology* 87:1038-1047. (doi:10.1890/0012-9658(2006)87[1038:HVAPTI]2.0.CO;2)
60. Neiman M, Lively CM (2004) Pleistocene glaciation is implicated in the phylogeographic structure of a New Zealand freshwater snail, *Potamopyrgus antipodarum*. *Mol Ecol* 13:3085-3098. (doi:10.1111/j.1365-294X.2004.02292.x)
61. Paczesniak D, Jokela J, Larkin K, Neiman M (2013) Discordance between nuclear and mitochondrial genomes in sexual and asexual lineages of the freshwater snail *Potamopyrgus antipodarum*. *Mol Ecol* 22:4695-4710. (doi:10.1111/mec.12422)
62. Ederli L, Dawe A, Pasqualini S, Quaglia M, Xiong L, Gehring C (2015) Arabidopsis flower specific defense gene expression patterns affect resistance to pathogens. *Front Plant Sci* 6:79. (doi:10.3389/fpls.2015.00079)
63. Dybdahl MF, Lively CM (1998) Host-parasite coevolution: evidence for rare advantage and time-lagged selection in a natural population. *Evolution* 52:1057-1066. (doi:10.2307/2411236)
64. Mitta G, Galinier R, Tisseyre P, Allienne JF, Girerd-Chambaz Y, Guillou F, Bouchut A, Coustau C (2005) Gene discovery and expression analysis of immune-relevant genes in *Biomphalaria glabrata* hemocytes. *Dev Comp Immunol* 29:393-407. (doi:10.1016/j.dci.2004.10.002)
65. Coustau C, Gourbal B, Duval D, Yoshino TP, Adema CM, Mitta G (2015) Advances in gastropod immunity from the study of the interaction between the snail *Biomphalaria glabrata* and its parasites: A review of research progress over the last decade. *Fish Shellfish Immunol* 4:5-16. (doi:10.1016/j.fsi.2015.01.036)

66. Adema CM, Hanington PC, Lun CM, Rosenberg GH, Aragon AD, Stout BA, Lennard Richard ML, Gross PS, Loker ES (2010) Differential transcriptomic responses of *Biomphalaria glabrata* (Gastropoda, Mollusca) to bacteria and metazoan parasites, *Schistosoma mansoni* and *Echinostoma paraense* (Digenea, Platyhelminthes). *Mol Immunol* 47:849-860. (doi:10.1016/j.molimm.2009.10.019)
67. Soper DM, King KC, Vergara D, Lively CM (2014) Exposure to parasites increases promiscuity in a freshwater snail. *Biol Lett* 10:20131091. (doi:10.1098/rsbl.2013.1091)
68. Levri EP, Lively CM (1996) The effect of size, reproductive condition, and parasitism on foraging behavior in a freshwater snail, *Potamopyrgus antipodarum*. *Animal Behavior* 51:891-901. (doi:10.1006/anbe.1996.0093)

## Table and Figure Legends

Table 1: Summary of inclusive and within-lake analyses. Left: number of significantly upregulated, downregulated, and total number of significantly differentially expressed genes in infected vs. uninfected snails (proportion of differentially expressed genes). Right: number of  $F_{ST}$  outlier SNPs between infected and uninfected snails, number of transcripts containing outlier SNPs, and the number of transcripts containing outlier SNPs that were significantly upregulated or downregulated in infected vs. uninfected snails.

Fig. 1. Heatmaps representing significantly differentially expressed transcripts (higher FPKM = higher expression). Significance was assessed with a FDR of 5% and Benjamini-Hochberg multiple test correction. a) Inclusive analysis: 1408 significantly differentially expressed transcripts in infected vs. uninfected snails. Transcripts above the black line demarcated with “\*” are downregulated in infected snails (1057), and transcripts below this line are upregulated in infected snails (351). b) Within-lake analysis: dendrogram and heatmap representing the 6228 significantly differentially expressed transcripts across infection status and lakes. “Ax” = Alexandrina, “Se” = Selfe, “Kn” = Kaniere, red = infected, blue = uninfected. Snails clustered by lake of origin rather than infection status, indicating spatially structured gene expression patterns. Highlighted regions of heatmap contain examples of: expression differences between infected and uninfected snails within a lake (green), lake-specific expression regardless of infection status (downregulation in Ax, blue), and across-lake upregulation in infected snails (purple).

Fig. 2. Mean transcriptome-wide  $F_{ST}$  (SD) calculated based on  $F_{ST}$  per site. From left to right, the first panel is mean pairwise  $F_{ST}$  between lakes (e.g., AxKn = mean pairwise  $F_{ST}$  between Alexandrina and Kaniere), the second panel is mean pairwise  $F_{ST}$  for infected replicates only, the third panel is mean  $F_{ST}$  for uninfected replicates only, and the fourth panel is mean  $F_{ST}$  between infected and uninfected snails within each lake. Lake acronyms follow Fig. 1. We used Welch’s t-tests to compare mean  $F_{ST}$  (+/- SD) for all possible pairwise comparisons with Bonferroni multiple test correction ( $p < 0.0001$ ; all comparisons were statistically significant).

Fig. 3. A multidimensional scaling (MDS) plot depicting how expression profiles are affected by lake population and infection status. Closer proximity of replicates in plot space indicates a more similar expression profile. Red = infected, blue = uninfected, diamonds = Alexandrina, triangles = Kaniere, circles = Selfe. The elliptical outlines (red = infected replicates from each lake; blue = uninfected replicates from each lake) delineate clustering for a particular replicate type and do

not represent formal statistical tests; these clustering patterns are further supported by a dendrogram (Fig. S3). While the expression profiles that characterize uninfected and infected snails within each lake reveal lake-specific gene expression responses to infection, the consistent shift to the right along the “M1” axis for infected *vs.* uninfected snails for each lake population (highlighted with arrows) also demonstrates across-lake commonalities in expression profiles for infected snails.

Fig. 4. Euler diagrams depicting the number of significantly differentially expressed genes in infected *vs.* uninfected snails for the within-lake analysis. Left: number of upregulated genes in single *vs.* multiple lake populations (*e.g.*, 47 genes upregulated in Kaniere; 0 genes upregulated in all three lakes). Right: number of downregulated genes in single *vs.* multiple populations. Circle size is proportional to the number of genes in that category.



Table 1. Summary of gene expression and  $F_{ST}$  outlier analyses.

|             | Expression analyses |           |               |       |                | $F_{ST}$ outlier analyses |             |             |               |
|-------------|---------------------|-----------|---------------|-------|----------------|---------------------------|-------------|-------------|---------------|
| Population  | Upregulated         |           | Downregulated | Total | FET $p$ -value | $F_{ST}$ outliers         | Transcripts | Upregulated | Downregulated |
| Alexandrina | 267 (0.27)          | <         | 728 (0.73)    | 995   | $p < 0.0001$   | 45                        | 37          | 2           | 6             |
| Kaniere     | 53 (0.34)           | <         | 103 (0.66)    | 156   | $p = 0.0011$   | 40                        | 31          | 0           | 0             |
| Selfe       | 267 (0.52)          | $\approx$ | 246 (0.48)    | 513   | $p = 0.4821$   | 51                        | 35          | 1           | 1             |
| Inclusive   | 351 (0.25)          | <         | 1057 (0.75)   | 1408  | $p < 0.0001$   | 58                        | 46          | 1           | 3             |

a.      Infected      Uninfected

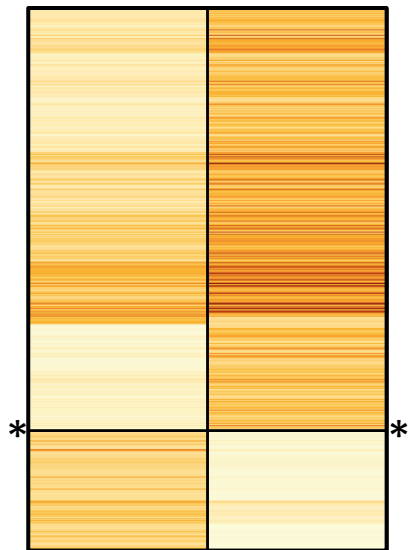

b.

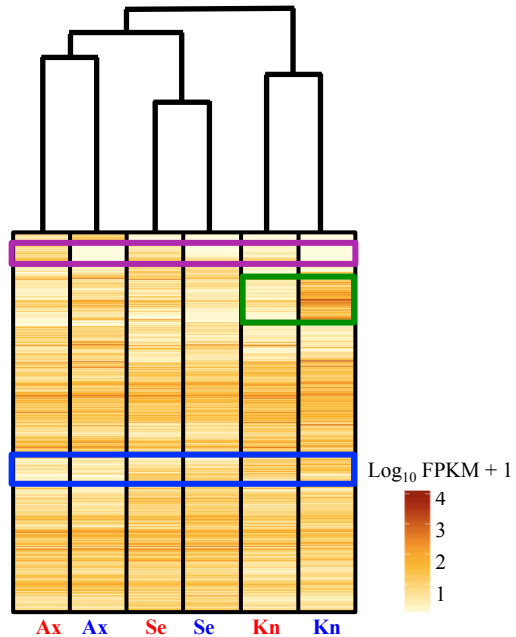

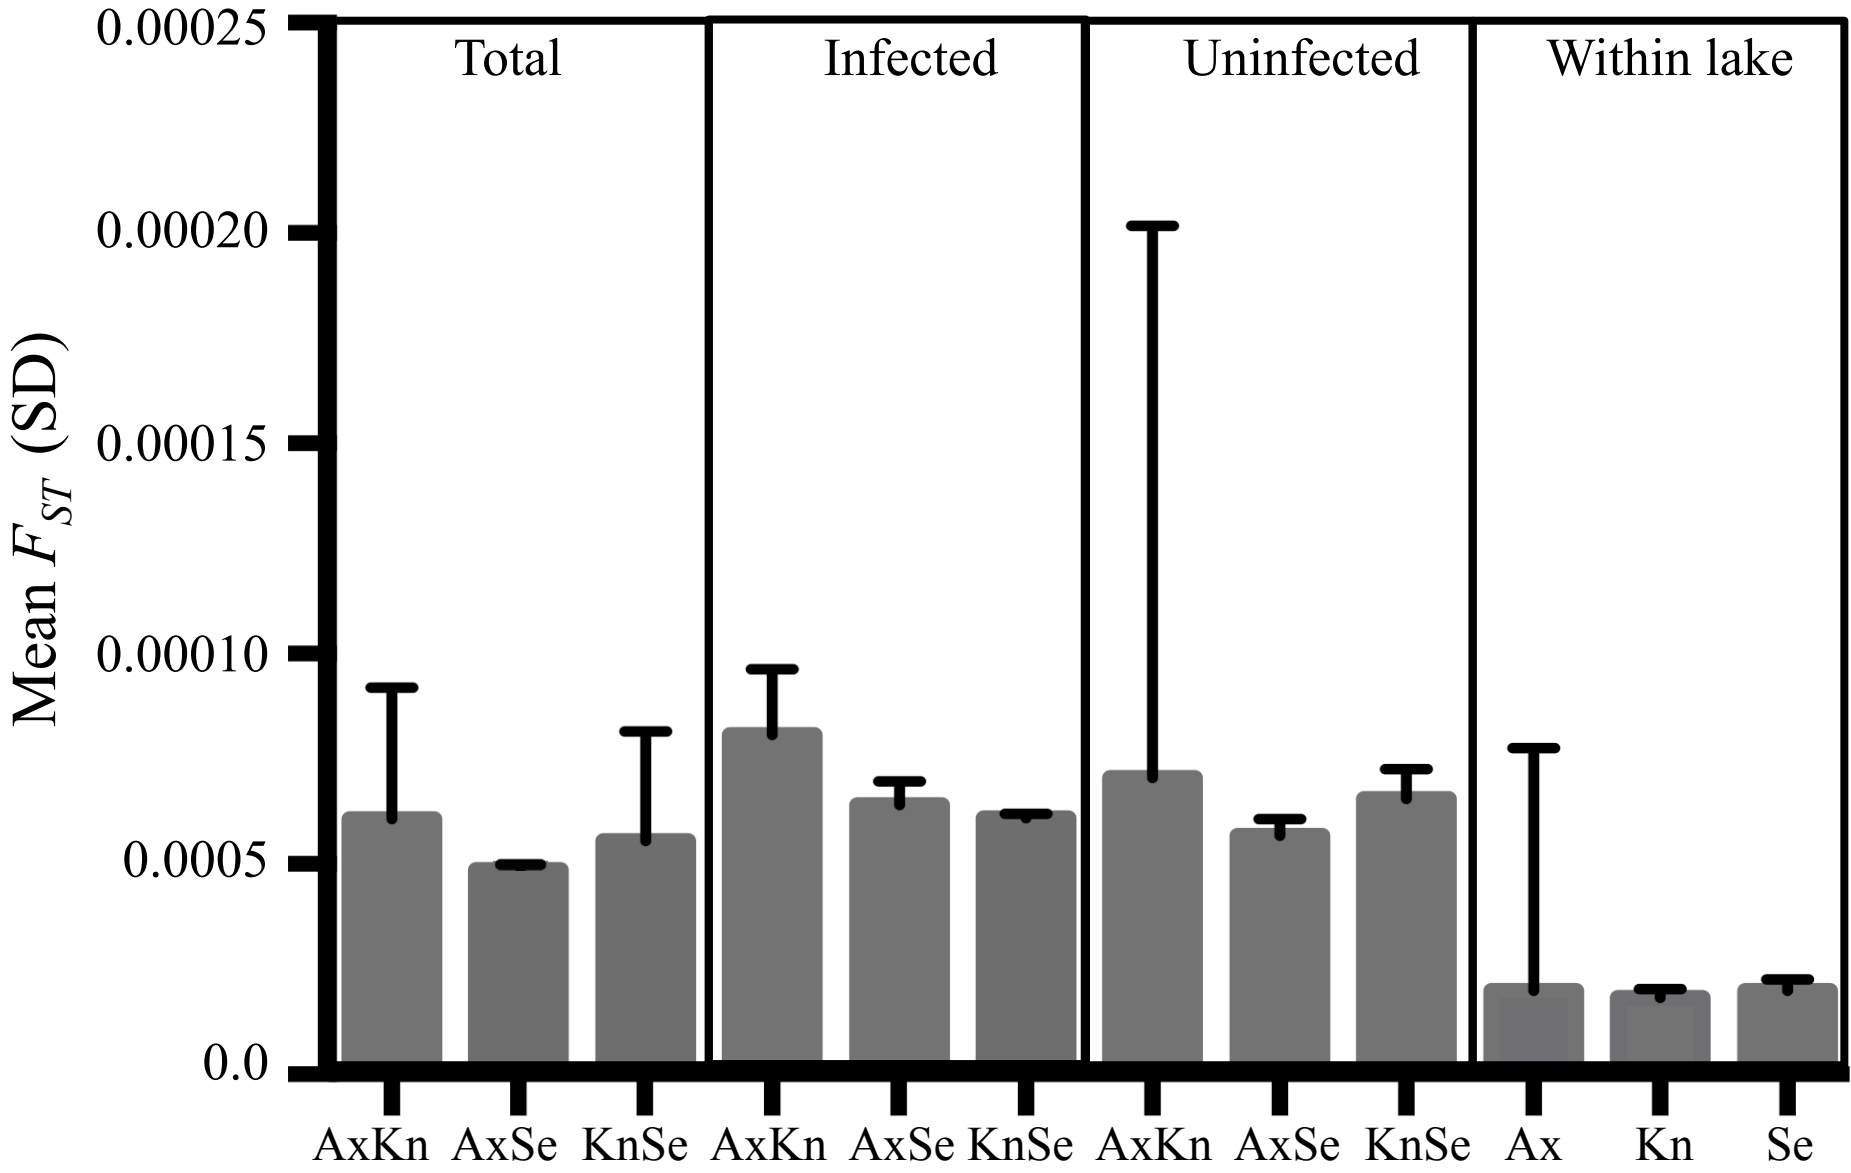

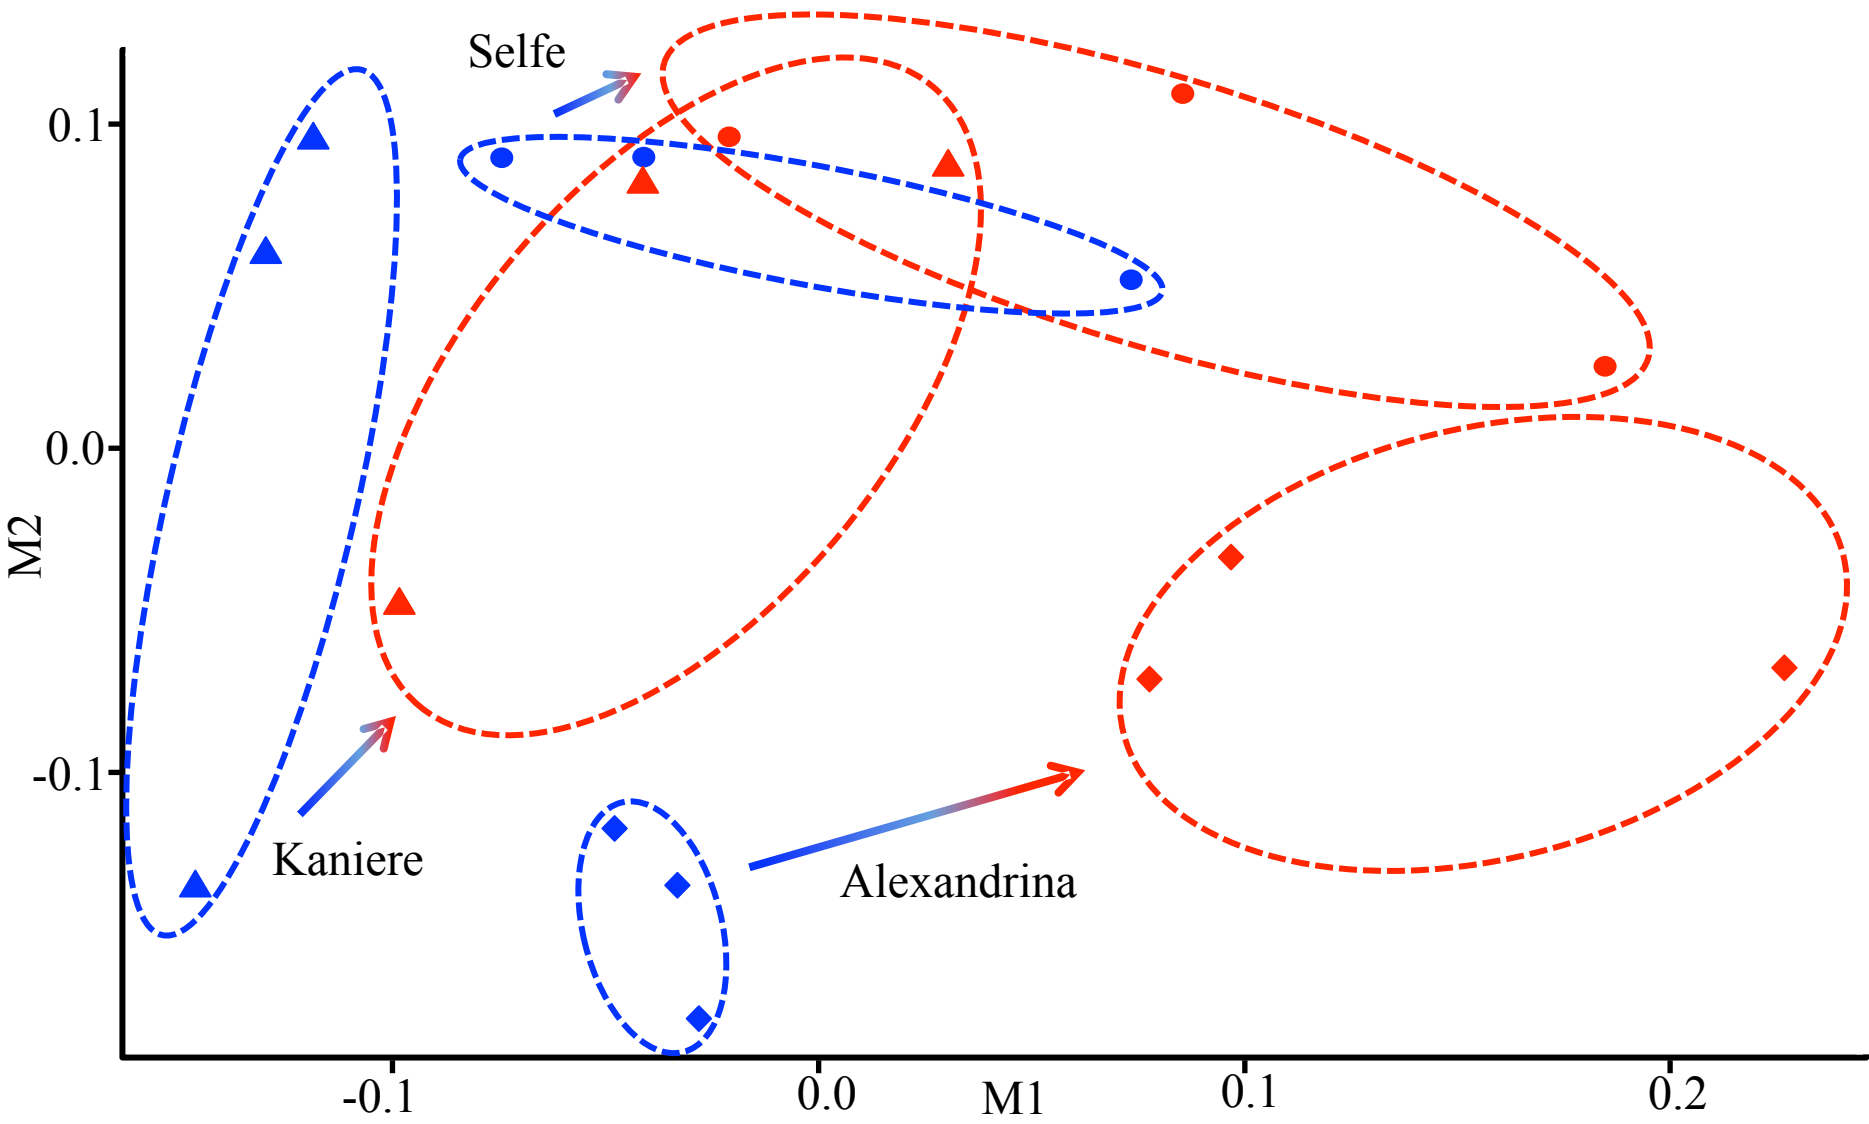

Upregulated  
(535 transcripts)

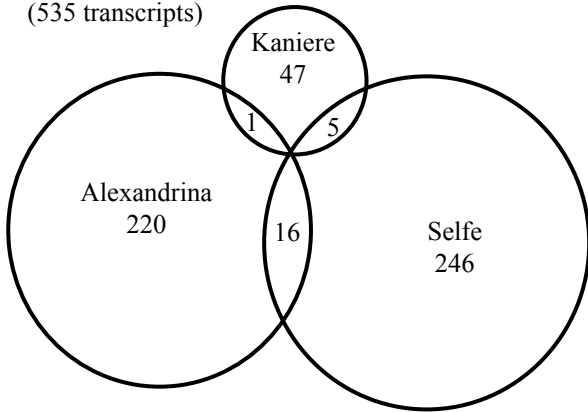

Downregulated  
(1004 transcripts)

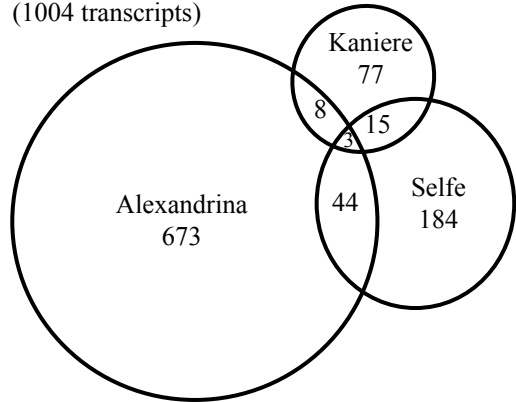

## 1    **Supplementary Methods**

2    **Sample preparation and RNA sequencing.** Because *Microphallus* infection fills the  
3    body cavity of *P. antipodarum*, we confined analyses to head tissue to ensure that  
4    comparable tissue types were isolated from infected and uninfected individuals. We first  
5    separated the head tissue of dissected snails, which does not contain *Microphallus*  
6    metacercariae, from body tissue. We then split the dissected head tissue into two halves.  
7    One head half was immediately submerged in 100  $\mu$ L RNAlater<sup>®</sup> Solution (Life  
8    Technologies Corporation) and stored at 4°C for 24 hours followed by storage at -80°C  
9    (according to manufacturer protocol) until RNA extraction. The other head half was  
10   immediately snap-frozen in liquid nitrogen and stored at -80°C for flow cytometric  
11   determination of ploidy level following (40).

12            We extracted RNA from pooled head tissue following the Invitrogen TRIzol  
13   protocol (41). RNA quantity and quality were assessed with a Bio-Rad Experion  
14   Automated Electrophoresis Station, following manufacturer protocol for the Experion  
15   RNA analysis kit with an RQI  $\geq$  8 and a minimum of 2 $\mu$ g of total RNA. RNA shearing  
16   and cDNA library preparation were completed following the Illumina Truseq LS protocol  
17   (Illumina, San Diego, CA, 2012). Following library preparation, we used an Illumina  
18   HiSeq 2000 for 2x100 bp paired-end RNA sequencing. Each RNA sample was given a  
19   unique indexed adapter sequence (Illumina, San Diego, CA, 2012) and was then  
20   separated into two halves, allowing us to sequence each sample twice in two different  
21   lanes in order to eliminate bias due to sequencing lane. We obtained a mean read length  
22   (SD) of 100.7 bp (0.96) and a mean number of paired-end reads/replicated sample/lane  
23   (SD) of 10070420 (1474539.10), for ~20000000 paired-end reads/replicate.

24

25 ***De novo* reference transcriptome assembly.** We used the FASTX Toolkit (42) and  
26 FastQC (43) to trim adapter sequences, assess sequencing quality, and remove poor-  
27 quality reads from the raw RNA-Seq data (see Table S2 for specific parameters). Quality  
28 filtering resulted in a mean number of reads/replicate/lane (SD) of 9871440.4  
29 (1468645.04), for a total of ~18000000 paired-end reads/replicate, about twice the  
30 coverage required to quantify expression differences across a wide range of expression  
31 levels (69). We assembled a *de novo* transcriptome using Trinity v. 2.0.4 and all of the  
32 combined filtered RNA-Seq data. First, we performed the recommended Trinity *in silico*  
33 normalization for each replicate in order to reduce the amount of memory required for the  
34 assembly process while maintaining a representative read set (following 44-45). We then  
35 used Trinity to assemble the normalized reads (45), generating a transcriptome assembly  
36 with 462736 transcripts (Table S2). We annotated protein-coding regions in the  
37 transcriptome in order to identify long ORFs of putative genes that could be missed by  
38 homology searches and to filter out miscalled isoforms by using the Trinity plugin  
39 TransDecoder (45) (Table S2). This step also lessens the influence of sequencing errors,  
40 misassembled transcripts, chimeric sequences, and other common assembly issues (70).  
41 Next, we used hierarchical clustering based on sequence identity to further reduce  
42 redundancy in the transcriptome assembly, as implemented in CD-HIT-EST (46) (Table  
43 S2). Finally, we identified and eliminated potential contaminant transcripts using the  
44 ‘blast\_taxonomy\_report.pl’ script from the Blobology pipeline (47), blastx (48), and a  
45 custom python script (available upon request). We used Blobology to filter out transcripts  
46 with non-metazoan top blast hits, as well as Platyhelminthes (representing potential

47 *Microphallus* contamination). These last filtering steps provided a final reference  
48 transcriptome assembly with 62862 transcripts.

49

50 **RNA-Seq gene expression analyses.** We used our *de novo* transcriptome as our  
51 reference assembly for all gene expression analyses in the Tuxedo pipeline. First, we  
52 mapped filtered reads to the *de novo* transcriptome assembly using TopHat2 (52). Next,  
53 we assembled mapped reads into transcripts and estimated transcript abundance with  
54 Cufflinks (53). We merged Cufflinks GTF and Tophat bam files for use in CuffDiff with  
55 Cuffmerge (53). Finally, we identified and quantified significant changes in gene  
56 expression using an FDR of 5% and Benjamini-Hochberg multiple test correction, as  
57 implemented in CuffDiff (53). We required that fragments per kilobase per million reads  
58 mapped (FPKM) exceeded zero to ensure that we were only comparing expression  
59 patterns among genes transcribed in all replicates (Table S2). We generated heatmaps and  
60 dendrograms with cummeRbund, allowing us to visualize significantly differentially  
61 expressed transcripts. We also used cummeRbund to generate MDS plots (54).

62

63 **GO annotation of differentially expressed transcripts.** We annotated the reference  
64 transcriptome by using blastx (48) with an E-value cutoff of 1e-5. We then imported  
65 these blastx results into Blast2GO to assign gene ontology ("GO") terms to blastx-  
66 annotated transcripts (49). Next, we compared the functions of differentially expressed  
67 transcripts between infected and uninfected replicates overall ("inclusive analysis") and  
68 within and across lakes ("within-lake analysis" and "across-lake analysis", respectively;  
69 Fig. S1) using the combined graph function in Blast2GO. With this analysis, we



generated a list of all GO terms present in the datasets and quantified the number of transcripts annotated with each GO term. This approach allowed us to identify the putative functions of transcripts that were significantly differentially expressed between infected and uninfected replicates in more than one lake population compared to transcripts that were only significantly differentially expressed between infected and uninfected replicates in a single lake. These comparisons were visualized with Euler diagrams generated with the program eulerAPE v3 (57). Finally, we used functional enrichment analyses and Fisher's Exact Tests implemented in Blast2GO to identify significantly over *vs.* underrepresented functional groups among the differentially expressed transcripts between infected and uninfected snails in the inclusive and within-lake analyses.

**SNP calling and  $F_{ST}$  outlier detection.** We performed  $F_{ST}$  outlier analyses in order to identify genes evolving especially rapidly in infected *vs.* uninfected snails; these genes can be considered candidates for the focus of *Microphallus*-mediated selection. We first filtered our *de novo* reference transcriptome down to only the transcripts with an FPKM > zero in all 18 replicates (30685 transcripts) to ensure that each replicate was represented for all loci in the  $F_{ST}$  comparisons. We used Tophat2 (52) with the same parameters as in the gene expression analyses to map RNA-Seq reads to the filtered reference transcriptome. We then used Picard Tools to prepare mapped reads for variant discovery (<http://picard.sourceforge.net>), applying the AddOrReplaceReadGroups script to add read groups to each mapped bam file. We then merged technical replicate bam files with the MergeSamFiles script, resulting in a single bam file for each of the 18 replicates. Finally,

93 we used the MarkDuplicates script to identify duplicate reads, removing reads that  
94 mapped to more than one location in the transcriptome. These processed bam files were  
95 then used to generate mpileup files using Samtools mpileup (55), which calls SNPs from  
96 the processed bam files (default parameters). Analyses of levels of nucleotide variation  
97 from pooled RNA-sequencing data with programs like Popoolation2 (56), which was  
98 developed to perform variant calling and calculate  $F_{ST}$  from pooled sequencing data, can  
99 effectively identify SNPs and candidate focal genes of selection and perform  $F_{ST}$ -based  
100 measures of genetic differentiation (*e.g.*, 71-72).

101 We used Popoolation2 for an inclusive analysis (all pooled infected replicates *vs.*  
102 all pooled uninfected replicates), within-lake analyses (Alexandrina infected *vs.*  
103 uninfected, Kaniere infected *vs.* uninfected, Selfe infected *vs.* uninfected), and across-  
104 lake analyses (Alexandrina *vs.* Kaniere, Alexandrina *vs.* Selfe, Kaniere *vs.* Selfe) (Fig.  
105 S1). The Popoolation2 pipeline begins by using the mpileup2sync.pl script to generate  
106 synchronized mpileup files that were filtered for base quality (Q20) and then applies the  
107 fst-sliding.pl script to calculate  $F_{ST}$  per site. In all cases, we required a minimum coverage  
108 of 10 (to account for sequencing errors and reduce the likelihood of false positives by  
109 ensuring that each SNP was sequenced multiple times), maximum coverage of 200 (to  
110 reduce memory usage and biases introduced by inter-locus variation in gene expression)  
111 (*e.g.*, 71-72), and otherwise used default parameters. We chose these parameters to  
112 reduce the likelihood of obtaining false positives at the risk of not detecting rare alleles  
113 (*e.g.*, 72). Finally, we used IBM SPSS Statistics v. 23 to perform outlier analyses to  
114 identify outlier SNPs between infected and uninfected snails as a whole (inclusive  
115 analysis) and between infected and uninfected snails within and between each lake and

116 lake pair. We also identified the expression patterns of each transcript containing  $F_{ST}$   
117 outlier SNPs based on the expression analyses detailed above and evaluated whether  
118 transcripts containing  $F_{ST}$  outliers between infected and uninfected snails contained  
119 outliers in multiple lake populations vs. only a single lake population. Finally, we  
120 compared mean transcriptome-wide  $F_{ST}$  between infected and uninfected snails within  
121 each lake and mean transcriptome-wide  $F_{ST}$  between lakes using Welch's t-tests as  
122 implemented in IBM SPSS Statistics v. 23 (Bonferroni corrected).

#### **Additional References (SI Methods only)**

69. Wolf JBW (2013) Principles of transcriptome analysis and gene expression quantification: an RNA-seq tutorial. *Mol Ecol Resour* 13:559-572. (doi:10.1111/1755-0998.12109)
70. De Wit P, Pespeni MH, Palumbi SR (2015) SNP genotyping and population genomics from expressed sequences – current advances and future possibilities. *Mol Ecol* 24:2310-2323. (doi:10.1111/mec.13165)
71. Fischer MC Rellstab C, Tedder A, Zoller S, Gugerli F, Shimizu KK, Holderegger R, Widmer A (2013) Population genomic footprints of selection and associations with climate in natural populations of *Arabidopsis halleri* from the Alps. *Mol Ecol* 22:5594-5607. (doi:10.1111/mec.12521)
72. Konczal M, Koteja P, Stuglik MT, Radwan J, Babik W (2014) Accuracy of allele frequency estimation using pooled RNA-Seq. *Mol Ecol Resour* 14:381-392. (doi:10.1111/1755-0998.12186)

Table S1. Location of sample sites and infection frequencies.

| Lake        | Location                 | Infection frequency<br>(Vergara <i>et al.</i> 2013) | Infection frequency<br>(present study) |
|-------------|--------------------------|-----------------------------------------------------|----------------------------------------|
| Alexandrina | -43.936736°, 170.460260° | 25.4%                                               | 20.90%                                 |
| Kaniere     | -42.806435°, 171.127667° | 10.3% (SD +/- 6.06)                                 | 10.60%                                 |
| Selfe       | -43.243705°, 171.518647° | 7.36% (SD +/- 6.53)                                 | 11.50%                                 |

Geographical coordinates of lakes sampled in this study and *Microphallus* infection frequencies as reported by Vergara *et al.* (2013) and in this study. Means and standard deviations are given for data from Vergara *et al.* (2013) when multiple years of sampling were available for the shallow region of a given lake (26). We determined infection frequency for this study by dissecting 116, 107, and 100 snails from Alexandrina, Kaniere, and Selfe, respectively.

Table S2. Programs and associated parameters used in transcriptome assembly and quantification and comparisons of patterns of gene expression.

| Program                                   | Purpose                                                                         | Parameters                                                                 | References |
|-------------------------------------------|---------------------------------------------------------------------------------|----------------------------------------------------------------------------|------------|
| FASTX Toolkit                             | Quality filtering of raw RNA-Seq reads                                          | Mean sequence Phred quality score cutoff = 20                              | 53         |
| Trinity ( <i>in silico</i> normalization) | Reduces memory requirement for assembly process, recommended for large datasets | Minimum kmer coverage = 2, maximum kmer coverage = 30                      | 55, 56     |
| Trinity (assembly)                        | <i>De novo</i> assembly of RNA-Seq data using normalized read set               | Default parameters                                                         | 55, 56     |
| TransDecoder                              | ORF annotation and miscalled isoform identification and filtering               | Default parameters                                                         | 56         |
| CD-HIT-EST                                | Hierarchical clustering-based method to reduce assembly redundancy              | Minimum sequence identity = 0.95, word size = 8 nucleotides                | 57         |
| Blobology (blast taxonomy report)         | Identification of potential contaminant transcripts                             | Default parameters                                                         | 58         |
| Tophat2                                   | Map filtered RNA-Seq reads to <i>de novo</i> reference transcriptome            | 3% mismatch between reads to account for polymorphism and sequencing error | 63, 64     |
| Cufflinks                                 | Assemble mapped reads into transcripts and estimate their abundances            | Upper-quartile normalization; multi-read correction                        | 63, 64     |
| Cuffmerge                                 | Merge Cufflinks gtf files and Tophat2 bam files for use in CuffDiff             | Default parameters                                                         | 64         |
| CuffDiff                                  | Quantify significant changes in gene expression                                 | FDR = 0.05, Benjamini-Hochberg multiple test correction, FPKM > 0          | 64         |

Table S3. Functionally enriched GO terms for significantly differentially expressed genes between infected and uninfected snails for the inclusive and within lake analyses.

| Functionally enriched GO terms for genes upregulated in infected snails in the inclusive analysis |            |                                                                                                 |          |                 |                 |                      |
|---------------------------------------------------------------------------------------------------|------------|-------------------------------------------------------------------------------------------------|----------|-----------------|-----------------|----------------------|
|                                                                                                   | GO-ID      | Term                                                                                            | FDR      | <i>p</i> -value | Percent in Test | Percent in Reference |
|                                                                                                   | GO:0032555 | purine ribonucleotide binding                                                                   | 7.52E-08 | 5.73E-11        | 16.52           | 10.68                |
|                                                                                                   | GO:0030554 | adenyl nucleotide binding                                                                       | 1.56E-06 | 1.90E-09        | 13.68           | 8.62                 |
|                                                                                                   | GO:0005524 | ATP binding                                                                                     | 1.80E-06 | 2.33E-09        | 13.39           | 8.38                 |
|                                                                                                   | GO:0019752 | carboxylic acid metabolic process                                                               | 2.68E-06 | 3.77E-09        | 8.55            | 3.89                 |
|                                                                                                   | GO:0015629 | actin cytoskeleton                                                                              | 4.24E-05 | 8.72E-08        | 4.27            | 1.16                 |
|                                                                                                   | GO:0005737 | cytoplasm                                                                                       | 1.17E-04 | 2.51E-07        | 28.77           | 29.87                |
|                                                                                                   | GO:0002479 | antigen processing and presentation of exogenous peptide antigen via MHC class I, TAP-dependent | 1.56E-04 | 3.69E-07        | 1.71            | 0.10                 |
|                                                                                                   | GO:0005829 | cytosol                                                                                         | 3.83E-04 | 9.92E-07        | 10.26           | 6.82                 |
|                                                                                                   | GO:0030016 | myofibril                                                                                       | 1.61E-03 | 4.80E-06        | 2.85            | 0.68                 |
|                                                                                                   | GO:0006508 | proteolysis                                                                                     | 2.53E-03 | 8.10E-06        | 6.55            | 3.67                 |
|                                                                                                   | GO:0006977 | DNA damage response, signal transduction by p53 class mediator resulting in cell cycle arrest   | 3.43E-03 | 1.23E-05        | 1.42            | 0.11                 |
|                                                                                                   | GO:0051436 | negative regulation of ubiquitin-protein ligase activity involved in mitotic cell cycle         | 3.43E-03 | 1.23E-05        | 1.42            | 0.11                 |
|                                                                                                   | GO:0044262 | cellular carbohydrate metabolic process                                                         | 3.50E-03 | 1.39E-05        | 2.85            | 0.78                 |
|                                                                                                   | GO:0006094 | gluconeogenesis                                                                                 | 3.50E-03 | 1.55E-05        | 1.71            | 0.22                 |
|                                                                                                   | GO:0006096 | glycolytic process                                                                              | 3.66E-03 | 1.64E-05        | 1.99            | 0.34                 |
|                                                                                                   | GO:0008092 | cytoskeletal protein binding                                                                    | 4.27E-03 | 2.08E-05        | 4.84            | 2.32                 |
|                                                                                                   | GO:0022624 | proteasome accessory complex                                                                    | 9.68E-03 | 5.68E-05        | 1.42            | 0.16                 |
|                                                                                                   | GO:0004613 | phosphoenolpyruvate carboxykinase (GTP) activity                                                | 1.35E-02 | 8.36E-05        | 0.85            | 0.03                 |
|                                                                                                   | GO:0006521 | regulation of cellular amino acid metabolic process                                             | 1.41E-02 | 8.79E-05        | 1.14            | 0.09                 |
|                                                                                                   | GO:0051437 | positive regulation of ubiquitin-protein ligase activity involved in mitotic cell cycle         | 1.42E-02 | 8.99E-05        | 1.42            | 0.18                 |
|                                                                                                   | GO:0015980 | energy derivation by oxidation of organic compounds                                             | 1.75E-02 | 1.13E-04        | 2.85            | 1.01                 |
|                                                                                                   | GO:0044449 | contractile fiber part                                                                          | 1.85E-02 | 1.21E-04        | 2.28            | 0.64                 |
|                                                                                                   | GO:0006116 | NADH oxidation                                                                                  | 2.63E-02 | 1.84E-04        | 0.57            | 0.00                 |
|                                                                                                   | GO:0031145 | anaphase-promoting complex-dependent proteasomal ubiquitin-dependent protein catabolic process  | 3.34E-02 | 2.52E-04        | 1.42            | 0.23                 |
|                                                                                                   | GO:0005977 | glycogen metabolic process                                                                      | 3.65E-02 | 2.82E-04        | 1.42            | 0.24                 |

|                                                                                                                                        |            |                                                  |          |                 |                 |                      |
|----------------------------------------------------------------------------------------------------------------------------------------|------------|--------------------------------------------------|----------|-----------------|-----------------|----------------------|
|                                                                                                                                        | GO:0006635 | fatty acid beta-oxidation                        | 3.65E-02 | 2.86E-04        | 1.14            | 0.13                 |
|                                                                                                                                        | GO:0036464 | cytoplasmic ribonucleoprotein granule            | 4.81E-02 | 3.88E-04        | 1.42            | 0.26                 |
| Functionally enriched GO terms for genes upregulated in uninfected snails (downregulated in infected snails) in the inclusive analysis |            |                                                  |          |                 |                 |                      |
|                                                                                                                                        | GO-ID      | Term                                             | FDR      | <i>p</i> -value | Percent in Test | Percent in Reference |
|                                                                                                                                        | GO:0003735 | structural constituent of ribosome               | 3.62E-10 | 1.40E-13        | 2.37            | 1.46                 |
|                                                                                                                                        | GO:0008810 | cellulase activity                               | 9.86E-09 | 6.01E-12        | 0.66            | 0.01                 |
|                                                                                                                                        | GO:0030247 | polysaccharide binding                           | 2.36E-08 | 1.98E-11        | 0.66            | 0.02                 |
|                                                                                                                                        | GO:0016985 | mannan endo-1,4-beta-mannosidase activity        | 2.10E-07 | 2.72E-10        | 0.66            | 0.04                 |
|                                                                                                                                        | GO:0046355 | mannan catabolic process                         | 2.10E-07 | 2.72E-10        | 0.66            | 0.04                 |
|                                                                                                                                        | GO:0006412 | translation                                      | 3.07E-05 | 4.91E-08        | 2.84            | 3.89                 |
|                                                                                                                                        | GO:0022626 | cytosolic ribosome                               | 2.80E-04 | 5.76E-07        | 1.14            | 0.73                 |
|                                                                                                                                        | GO:0042742 | defense response to bacterium                    | 4.93E-03 | 1.09E-05        | 0.57            | 0.18                 |
|                                                                                                                                        | GO:0030833 | regulation of actin filament polymerization      | 1.06E-02 | 2.66E-05        | 0.66            | 0.32                 |
|                                                                                                                                        | GO:0009506 | plasmodesma                                      | 1.65E-02 | 4.77E-05        | 0.47            | 0.14                 |
|                                                                                                                                        | GO:0045493 | xylan catabolic process                          | 2.14E-02 | 6.70E-05        | 0.28            | 0.02                 |
|                                                                                                                                        | GO:0015935 | small ribosomal subunit                          | 2.27E-02 | 7.25E-05        | 0.76            | 0.53                 |
|                                                                                                                                        | GO:0030301 | cholesterol transport                            | 3.34E-02 | 1.12E-04        | 0.47            | 0.17                 |
|                                                                                                                                        | GO:0015934 | large ribosomal subunit                          | 4.86E-02 | 1.67E-04        | 0.66            | 0.44                 |
| Functionally enriched GO terms for genes upregulated in infected snails in the within lake analysis                                    |            |                                                  |          |                 |                 |                      |
|                                                                                                                                        | GO-ID      | Term                                             | FDR      | <i>p</i> -value | Percent in Test | Percent in Reference |
| Alexandrina                                                                                                                            | GO:0004613 | phosphoenolpyruvate carboxykinase (GTP) activity | 4.92E-03 | 7.50E-07        | 6.67            | 0.03                 |
|                                                                                                                                        | GO:0006089 | lactate metabolic process                        | 1.76E-02 | 7.93E-06        | 4.44            | 0.00                 |
|                                                                                                                                        | GO:0042593 | glucose homeostasis                              | 1.76E-02 | 8.59E-06        | 8.89            | 0.27                 |
|                                                                                                                                        | GO:0010817 | regulation of hormone levels                     | 2.00E-02 | 1.22E-05        | 11.11           | 0.64                 |
|                                                                                                                                        | GO:0030073 | insulin secretion                                | 2.22E-02 | 1.52E-05        | 8.89            | 0.31                 |
|                                                                                                                                        | GO:0046327 | glycerol biosynthetic process from pyruvate      | 2.84E-02 | 2.38E-05        | 4.44            | 0.01                 |
| Kaniere                                                                                                                                | None       |                                                  |          |                 |                 |                      |
| Selfe                                                                                                                                  | None       |                                                  |          |                 |                 |                      |
| Functionally enriched GO terms for genes upregulated in uninfected snails in the within lake analysis                                  |            |                                                  |          |                 |                 |                      |
|                                                                                                                                        | GO-ID      | Term                                             | FDR      | <i>p</i> -value | Percent in Test | Percent in Reference |
| Alexandrina                                                                                                                            | GO:0003735 | structural constituent of ribosome               | 2.64E-07 | 6.04E-11        | 9.63            | 1.51                 |
|                                                                                                                                        | GO:0006412 | translation                                      | 2.02E-04 | 7.70E-08        | 12.84           | 3.96                 |
|                                                                                                                                        | GO:0022626 | cytosolic ribosome                               | 2.98E-03 | 1.59E-06        | 5.05            | 0.75                 |
|                                                                                                                                        | GO:0016798 | hydrolase activity, acting on glycosyl bonds     | 2.18E-02 | 1.65E-05        | 5.96            | 1.37                 |
|                                                                                                                                        | GO:0015935 | small ribosomal subunit                          | 4.39E-02 | 3.68E-05        | 3.67            | 0.53                 |

|         |            |                                             |          |          |       |       |
|---------|------------|---------------------------------------------|----------|----------|-------|-------|
| Kaniere | GO:0017159 | pantetheine hydrolase activity              | 1.61E-02 | 1.23E-06 | 11.11 | 0.00  |
|         | GO:0015939 | pantothenate metabolic process              | 2.41E-02 | 3.68E-06 | 11.11 | 0.01  |
| Selfe   | GO:0006418 | tRNA aminoacylation for protein translation | 3.26E-09 | 4.97E-13 | 13.75 | 0.48  |
|         | GO:0004812 | aminoacyl-tRNA ligase activity              | 3.26E-09 | 4.97E-13 | 13.75 | 0.48  |
|         | GO:0000049 | tRNA binding                                | 7.01E-06 | 4.81E-09 | 7.50  | 0.14  |
|         | GO:0043022 | ribosome binding                            | 5.46E-04 | 6.23E-07 | 6.25  | 0.18  |
|         | GO:0032797 | SMN complex                                 | 1.19E-02 | 2.53E-05 | 2.50  | 0.00  |
|         | GO:0032575 | ATP-dependent 5'-3' RNA helicase activity   | 1.19E-02 | 2.53E-05 | 2.50  | 0.00  |
|         | GO:0005829 | cytosol                                     | 1.40E-02 | 3.36E-05 | 21.25 | 6.97  |
|         | GO:0000166 | nucleotide binding                          | 2.36E-02 | 6.39E-05 | 35.00 | 16.75 |
|         | GO:0022403 | cell cycle phase                            | 4.06E-02 | 1.14E-04 | 3.75  | 0.10  |

Functionally enriched GO terms for the inclusive analysis and the within-lake analysis; enrichment was determined via significant outcome of Fisher's Exact tests with FDR < 0.05 as implemented in Blast2GO. "Percent in Test" refers to the percent of transcripts in the test dataset (*e.g.*, upregulated in infected snails in the inclusive analysis) that were assigned a particular GO term. "Percent in Reference" refers to the percent of transcripts in the reference transcriptome that were assigned a particular GO term.



Table S4. Functional annotation of transcripts containing at least one  $F_{ST}$  outlier SNP between infected and uninfected snails and the expression pattern of these transcripts.

| Comparison         | Annotation                                                   | Expression Pattern |
|--------------------|--------------------------------------------------------------|--------------------|
| Inclusive analysis | cathepsin 1                                                  | downregulated      |
|                    | probable serine threonine-protein kinase fhkb                | n.s.               |
|                    | cellulase egx3                                               | n.s.               |
|                    | protein deglycase dj-1                                       | n.s.               |
|                    | alkali-sensitive linkage protein 1-like                      | n.s.               |
|                    | pancreatic triacylglycerol lipase-like                       | upregulated        |
|                    | lambda-crystallin homolog                                    | n.s.               |
|                    | upf0764 protein c16orf89 homolog                             | n.s.               |
|                    | PREDICTED: uncharacterized protein LOC106079933              | n.s.               |
|                    | PREDICTED: uncharacterized protein C9orf78 homolog           | n.s.               |
|                    | alpha-aminoadipic semialdehyde dehydrogenase                 | n.s.               |
|                    | alpha-l-fucosidase-like                                      | n.s.               |
|                    | deleted in malignant brain tumors 1 partial                  | downregulated      |
|                    | kielin chordin-like protein                                  | n.s.               |
|                    | intraflagellar transport protein 88 homolog isoform x1       | n.s.               |
|                    | solute carrier family 26 member 6-like                       | n.s.               |
|                    | exonuclease 3 -5 domain-containing protein 1                 | n.s.               |
|                    | cell wall integrity and stress response component 4-like     | n.s.               |
|                    | signal recognition particle 19 kda protein                   | n.s.               |
|                    | contactin-like                                               | n.s.               |
|                    | c-type lectin                                                | n.s.               |
| Within lake        |                                                              |                    |
| Alexandrina        | transcription elongation factor b polypeptide 2-like         | n.s.               |
|                    | chymotrypsin-like serine proteinase                          | downregulated      |
|                    | perlucin-like protein                                        | n.s.               |
|                    | mammalian ependymin-related protein 1-like                   | n.s.               |
|                    | uncharacterized oxidoreductase -like                         | n.s.               |
|                    | amyloid beta a4 protein isoform x2                           | n.s.               |
|                    | tyrosinase-like protein tyr-1                                | n.s.               |
|                    | pleckstrin homology domain-containing family b member 2-like | n.s.               |
|                    | microtubule-actin cross-linking factor isoforms 1 2 3 5-like | n.s.               |
|                    | cytochrome p450 3a7-like                                     | n.s.               |
|                    | neurexin-4 isoform x2                                        | downregulated      |
|                    | complement c1q-like protein 2                                | n.s.               |
|                    | v-type proton atpase 16 kda proteolipid subunit              | n.s.               |
|                    | adenylate kinase 9                                           | n.s.               |

|         |                                                      |      |
|---------|------------------------------------------------------|------|
| Kaniere | proteasome subunit beta type-1                       | n.s. |
|         | 60s ribosomal protein l23a                           | n.s. |
|         | electron transfer flavoprotein subunit mitochondrial | n.s. |
|         | chitin-binding protein                               | n.s. |
|         | cd109 antigen-like                                   | n.s. |
|         | kielin chordin-like protein                          | n.s. |
|         | hemk methyltransferase family member 1               | n.s. |
|         | ganglioside gm2 activator                            | n.s. |
|         | proteasome inhibitor pi31 subunit                    | n.s. |
|         | aconitate mitochondrial-like                         | n.s. |
|         | ependymin-related protein 1-like                     | n.s. |
|         | protein pif-like                                     | n.s. |
| Selfe   | 39s ribosomal protein mitochondrial                  | n.s. |
|         | neuropilin-2 isoform x2                              | n.s. |
|         | transmembrane protease serine 2                      | n.s. |
|         | goose-type lysozyme 2                                | n.s. |
|         | carboxypeptidase b-like                              | n.s. |
|         | thioester-containing protein                         | n.s. |
|         | mucin-5ac-like isoform x1                            | n.s. |
|         | peptidoglycan recognition protein s11                | n.s. |
|         | mucin-5ac- partial                                   | n.s. |
|         | papilin-like isoform x1                              | n.s. |
|         | neurocalcin homolog                                  | n.s. |
|         | signal peptidase complex subunit 3-like              | n.s. |
|         | sperm-associated antigen 6                           | n.s. |
|         | cartilage matrix                                     | n.s. |
|         | blastula protease 10                                 | n.s. |

Annotations for transcripts containing at least one  $F_{ST}$  outlier SNP between infected and uninfected snails and that received functional annotations using Blast2GO. The expression pattern of each transcript is based on the expression analyses for the analogous comparison. Upregulated means the transcript was upregulated in infected relative to uninfected snails, downregulated means that the transcript was downregulated in infected relative to uninfected snails, and "n.s." means that the transcript was not significantly differentially expressed between infected and uninfected snails.

Table S5. Level 2 GO terms assigned to annotated transcripts that also contained at least one  $F_{ST}$  outlier SNP as well as the number of transcripts that received each GO term within a particular comparison.

| Comparison         | GO-id      | GO-term                                       | Number of Transcripts |
|--------------------|------------|-----------------------------------------------|-----------------------|
| Inclusive analysis | GO:0051179 | localization                                  | 5                     |
|                    | GO:0071840 | cellular component organization or biogenesis | 4                     |
|                    | GO:0023052 | signaling                                     | 3                     |
|                    | GO:0009987 | cellular process                              | 9                     |
|                    | GO:0051704 | multi-organism process                        | 2                     |
|                    | GO:0032502 | developmental process                         | 2                     |
|                    | GO:0044699 | single-organism process                       | 10                    |
|                    | GO:0008152 | metabolic process                             | 13                    |
|                    | GO:0065007 | biological regulation                         | 4                     |
|                    | GO:0022414 | reproductive process                          | 2                     |
|                    | GO:0050896 | response to stimulus                          | 3                     |
|                    | GO:0002376 | immune system process                         | 1                     |
|                    | GO:0032501 | multicellular organismal process              | 3                     |
|                    | GO:0007610 | behavior                                      | 2                     |
|                    | GO:0000003 | reproduction                                  | 2                     |
| Within lake        |            |                                               |                       |
| Alexandrina        | GO:0051179 | localization                                  | 2                     |
|                    | GO:0071840 | cellular component organization or biogenesis | 2                     |
|                    | GO:0023052 | signaling                                     | 1                     |
|                    | GO:0009987 | cellular process                              | 5                     |
|                    | GO:0051704 | multi-organism process                        | 2                     |
|                    | GO:0032502 | developmental process                         | 3                     |
|                    | GO:0040011 | locomotion                                    | 1                     |
|                    | GO:0044699 | single-organism process                       | 7                     |
|                    | GO:0008152 | metabolic process                             | 8                     |
|                    | GO:0065007 | biological regulation                         | 2                     |
|                    | GO:0022610 | biological adhesion                           | 2                     |
|                    | GO:0022414 | reproductive process                          | 1                     |
|                    | GO:0050896 | response to stimulus                          | 2                     |
|                    | GO:0040007 | growth                                        | 1                     |
|                    | GO:0007610 | behavior                                      | 1                     |
|                    | GO:0032501 | multicellular organismal process              | 3                     |
|                    | GO:0000003 | reproduction                                  | 1                     |
| Kaniere            | GO:0051179 | localization                                  | 1                     |
|                    | GO:0009987 | cellular process                              | 8                     |
|                    | GO:0044699 | single-organism process                       | 3                     |
|                    | GO:0008152 | metabolic process                             | 10                    |

|       |            |                                               |    |
|-------|------------|-----------------------------------------------|----|
|       | GO:0065007 | biological regulation                         | 5  |
|       | GO:0022610 | biological adhesion                           | 1  |
|       | GO:0007610 | behavior                                      | 1  |
|       | GO:0032501 | multicellular organismal process              | 1  |
| Selfe | GO:0051179 | localization                                  | 3  |
|       | GO:0071840 | cellular component organization or biogenesis | 3  |
|       | GO:0023052 | signaling                                     | 3  |
|       | GO:0051704 | multi-organism process                        | 2  |
|       | GO:0009987 | cellular process                              | 9  |
|       | GO:0032502 | developmental process                         | 2  |
|       | GO:0040011 | locomotion                                    | 2  |
|       | GO:0044699 | single-organism process                       | 5  |
|       | GO:0008152 | metabolic process                             | 11 |
|       | GO:0065007 | biological regulation                         | 7  |
|       | GO:0022610 | biological adhesion                           | 2  |
|       | GO:0050896 | response to stimulus                          | 6  |
|       | GO:0040007 | growth                                        | 1  |
|       | GO:0032501 | multicellular organismal process              | 3  |

Table S6. Genes with significant up *vs.* downregulation in more than one population in the within-lake analysis that received both blastx and GO annotations.

|                                 | Upregulated in infected snails |                            |                                                                                                                                                                  | Downregulated in infected snails |                            |                                                                                                                                                                                                                                                                                                                                                                                                                                 |
|---------------------------------|--------------------------------|----------------------------|------------------------------------------------------------------------------------------------------------------------------------------------------------------|----------------------------------|----------------------------|---------------------------------------------------------------------------------------------------------------------------------------------------------------------------------------------------------------------------------------------------------------------------------------------------------------------------------------------------------------------------------------------------------------------------------|
| Populations                     | Total # of transcripts         | # of transcripts annotated | Annotations                                                                                                                                                      | Total # of transcripts           | # of transcripts annotated | Annotations                                                                                                                                                                                                                                                                                                                                                                                                                     |
| Alexandrina and Kaniere         | 1                              | 0                          | N/A                                                                                                                                                              | 8                                | 2                          | ribosomal protein l44e<br>uncharacterized oxidoreductase yrbe-like                                                                                                                                                                                                                                                                                                                                                              |
| Alexandrina and Selfe           | 15                             | 6                          | protein jagged-2<br>tryptophan -dioxygenase<br>annexin a7<br><br>tyramine beta-hydroxylase<br>phosphoenolpyruvate cytosolic<br>phosphoenolpyruvate carboxykinase | 44                               | 11                         | tyrosinase-like protein tyr-3<br>achain keyhole limpet hemocyanin<br>hemocyanin isoform 1<br><br>beta- -galactosyl-o-glycosyl-glycoprotein<br>beta- -n-acetylglucosaminyltransferase 4<br>von willebrand factor type a<br><br>5 -nucleotidase<br>elongation factor 2<br>gtp-binding protein 1<br>lysine--trna ligase-like<br><br>eukaryotic translation initiation factor 2 subunit 3-like<br>low quality protein: hemicentin-1 |
| Kaniere and Selfe               | 5                              | 0                          | N/A                                                                                                                                                              | 15                               | 2                          | myosin heavy chain<br>collagen alpha-1 chain-like                                                                                                                                                                                                                                                                                                                                                                               |
| Alexandrina, Kaniere, and Selfe | 0                              | 0                          | N/A                                                                                                                                                              | 3                                | 0                          | N/A                                                                                                                                                                                                                                                                                                                                                                                                                             |

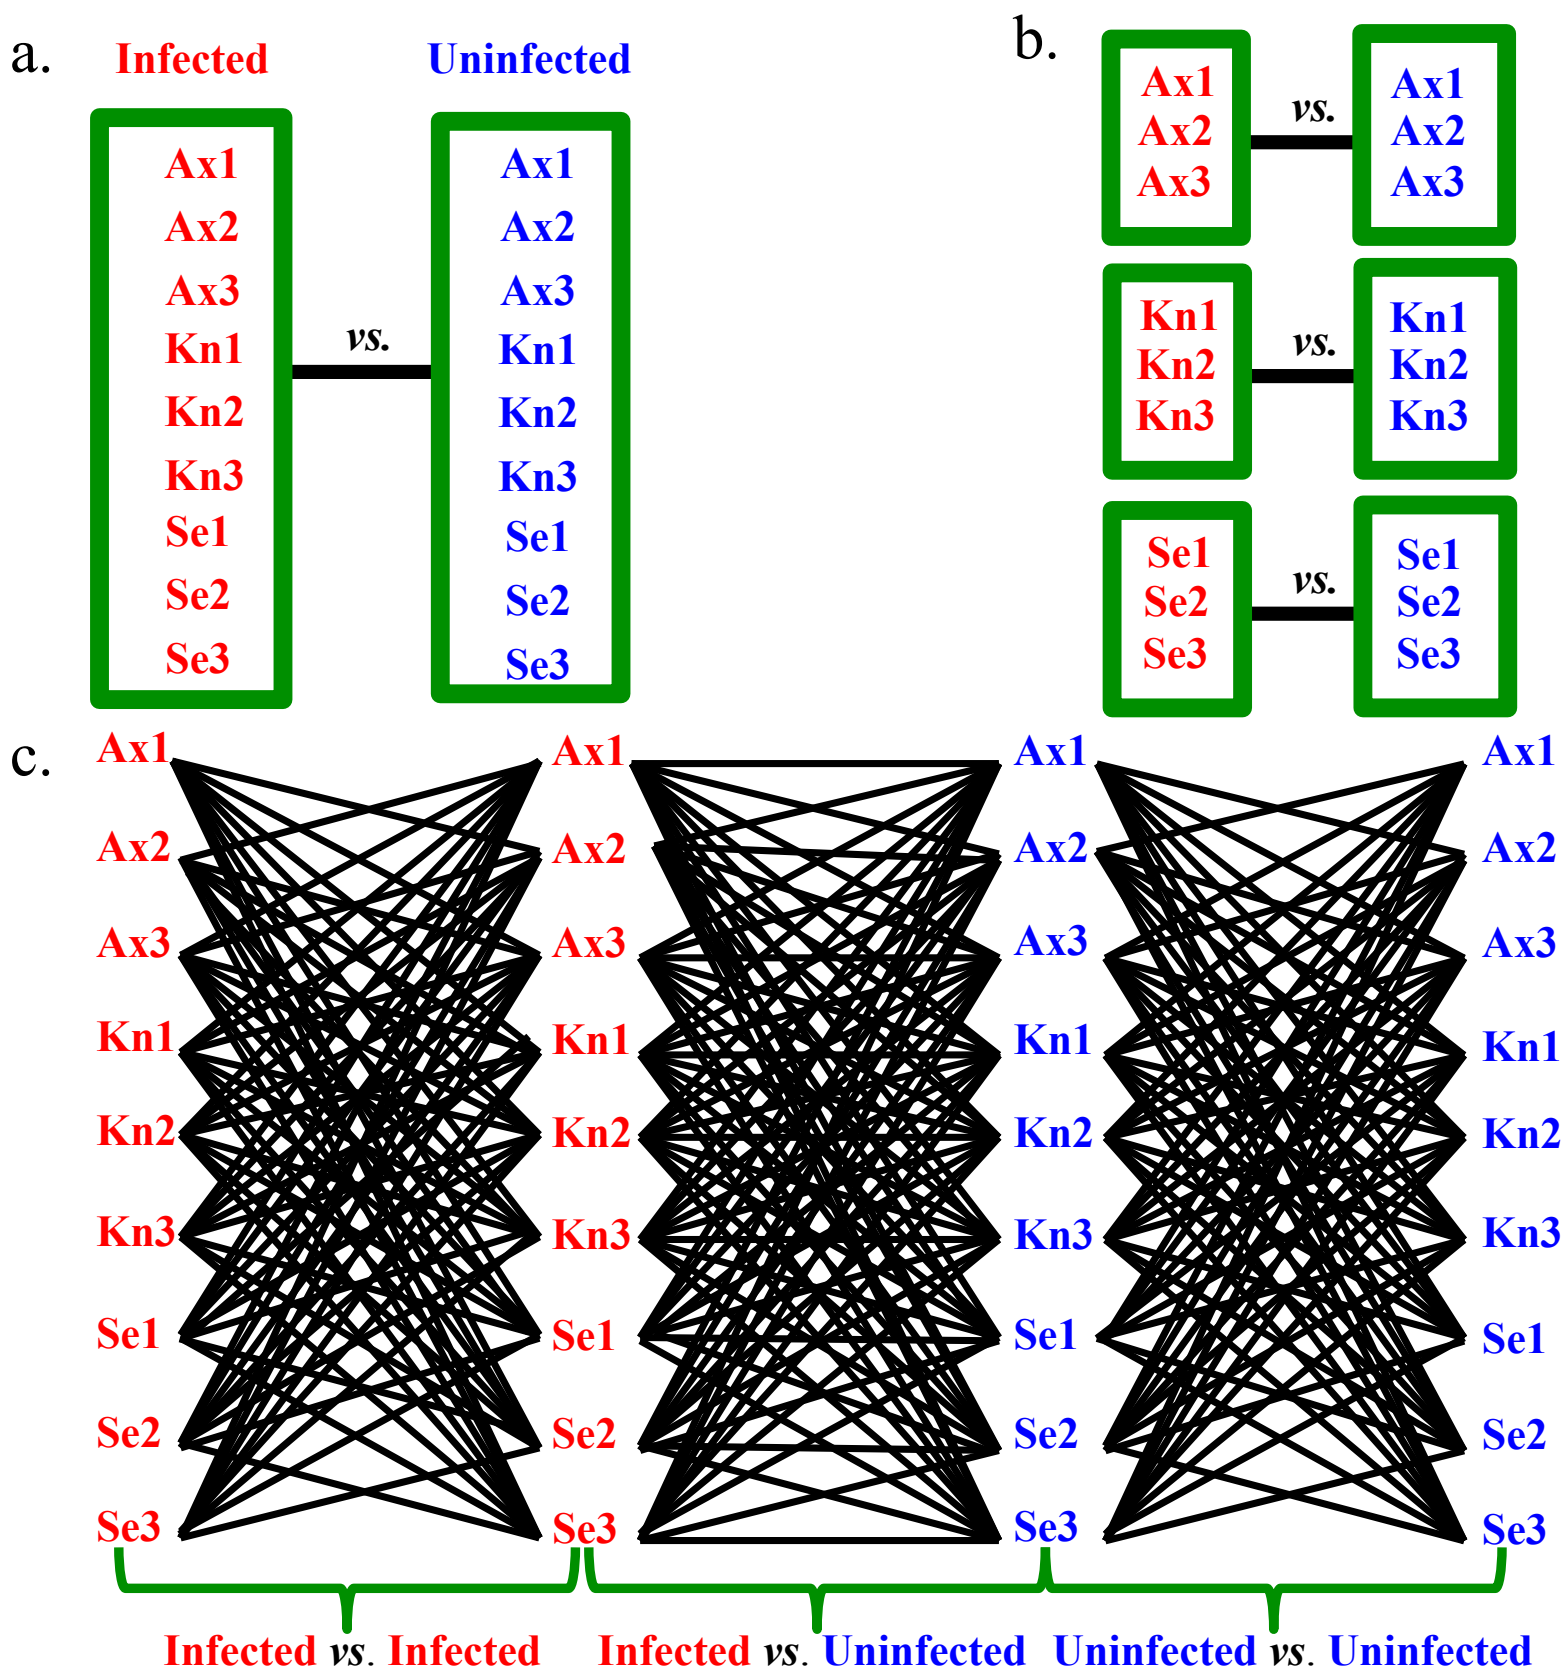

Fig. S1. Schematic depicting our three hierarchical analyses. Ax = *Alexandrina*, Kn = *Kaniere*, Se = *Selfe*; numbers after lake names refer to biological replicates. Black lines are drawn between the groups/samples being compared. a) “inclusive analysis,” comparing all infected samples pooled vs. all uninfected samples pooled, b) “within-lake analysis,” comparing infected vs. uninfected samples within each lake, c) “across-lake analysis,” performing all possible pairwise comparisons between samples.

Upregulated in  
infected snails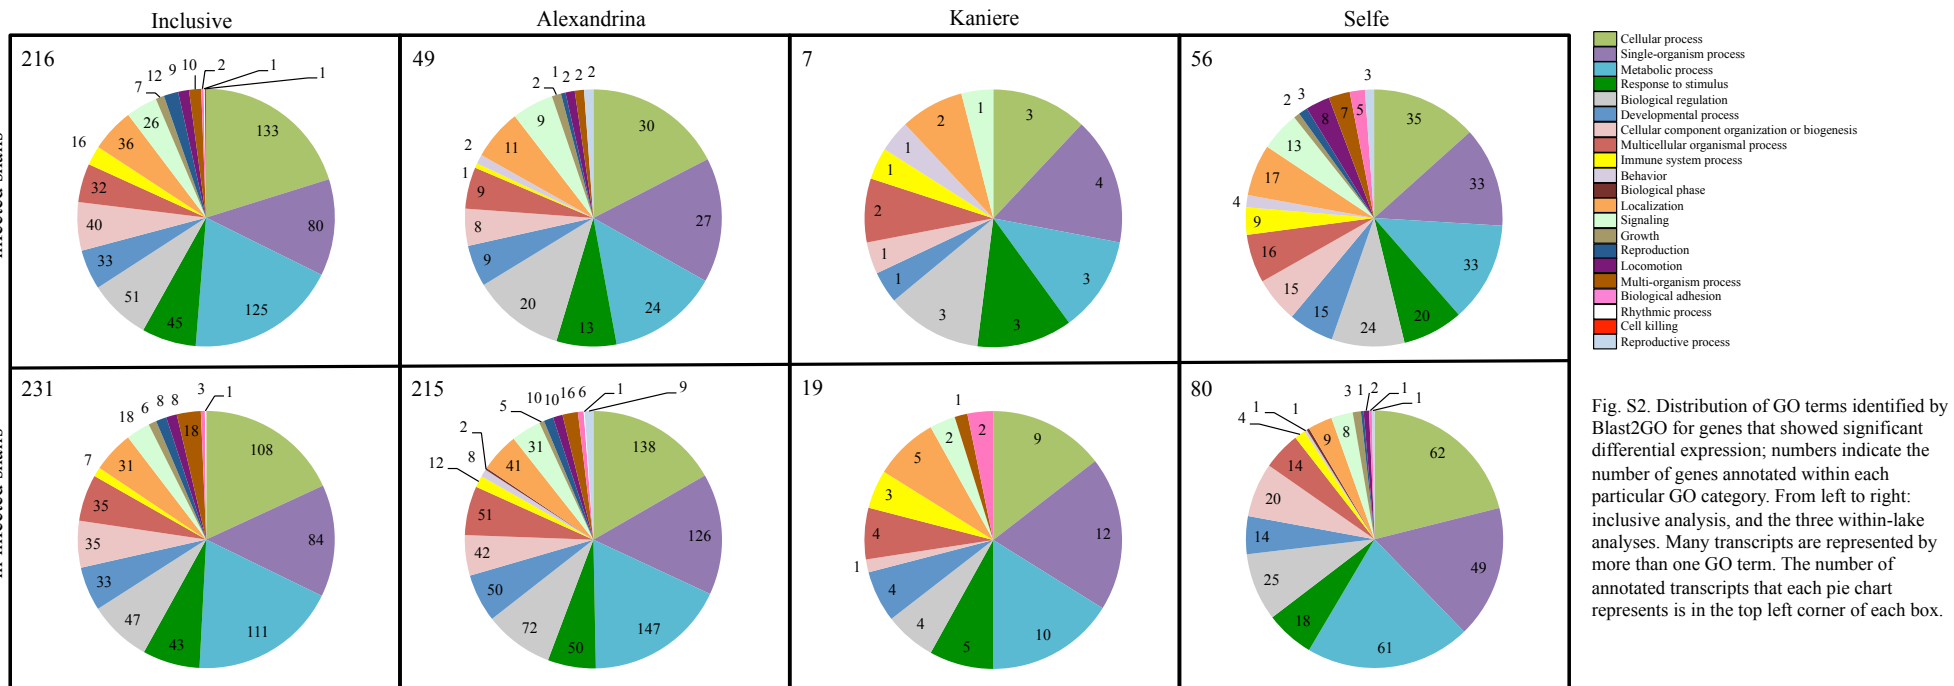

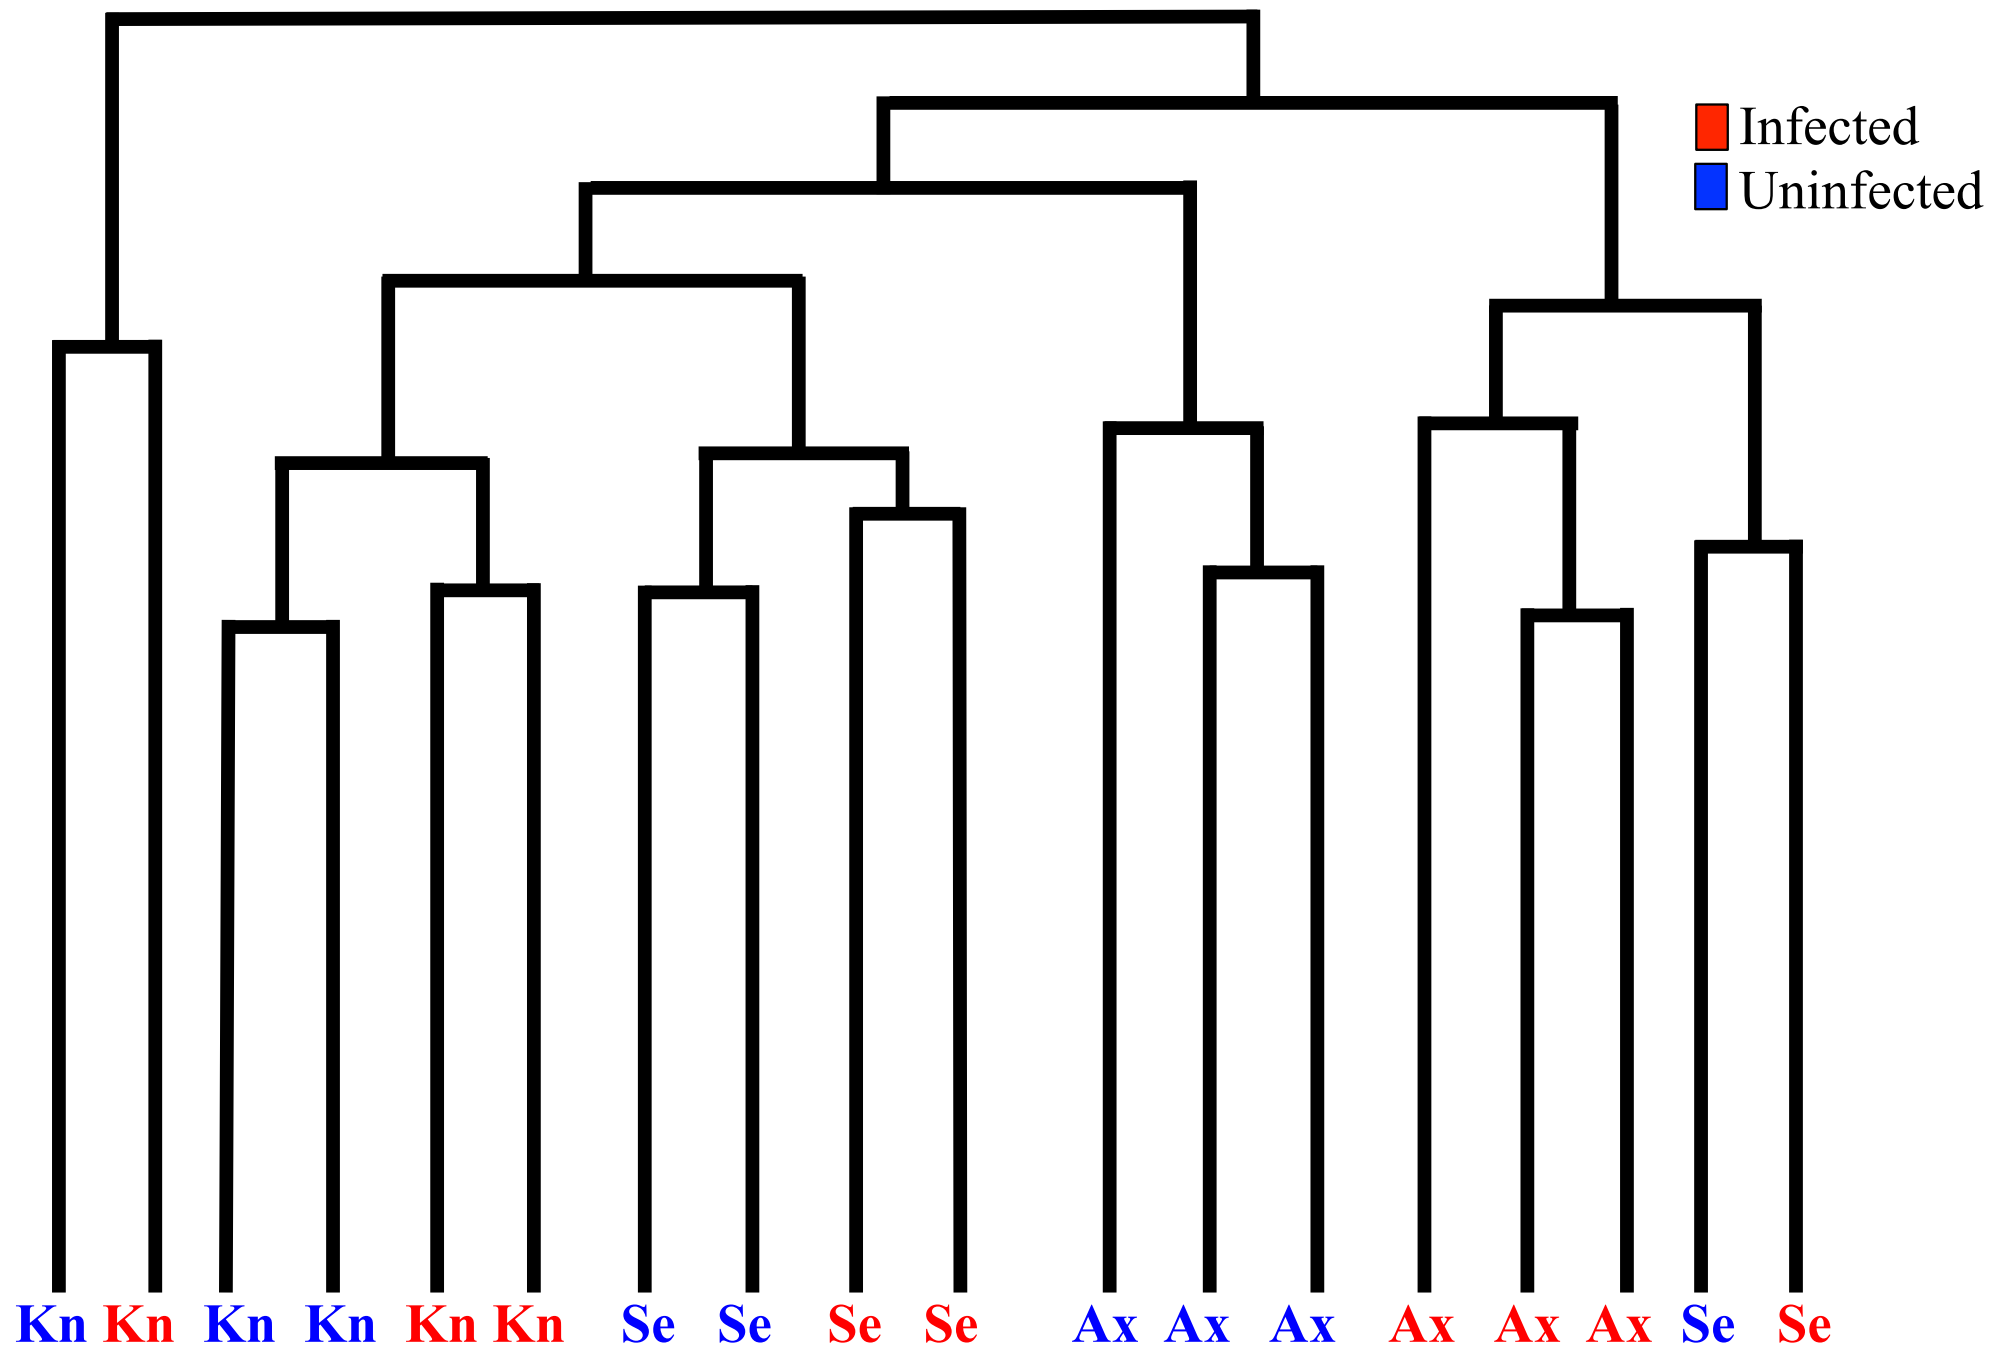

Fig. S3. Dendrogram (generated with cummeRbund) depicting how expression profile is influenced by lake of origin and infection status. Samples are clustered based on their expression profile using the Jensen-Shannon distance. Samples that have more similar expression profiles are grouped more closely together. These results recapitulate and strengthen those depicted in the MDS plot (Fig. 4).
